# Supplementary material for: Pyrene-containing conjugated organic microporous polymers for photocatalytic hydrogen evolution from water
Source: Royal Society of Chemistry journal article supplement (doi:10.1039/d0cy02482a), 2021-01-01
Supplement: d0cy02482a1.pdf [file d0cy02482a1.pdf]

## Supporting Information for

# Pyrene Containing Conjugated Organic Microporous Polymers for Photocatalytic Hydrogen Evolution from Water

**Mohamed Gamal Mohamed,<sup>a,b,#</sup> Mohamed Hammad Elsayed,<sup>c,d,#</sup> Ahmed M. Elewa,<sup>c</sup> Ahmed F. M. EL-Mahdy,<sup>a</sup> Cheng-Han Yang,<sup>a</sup> Ahmed A.K. Mohammed,<sup>b</sup> Ho-Hsiu Chou,<sup>c,\*</sup> and Shiao-Wei Kuo<sup>a,e,\*</sup>**

<sup>a</sup>Department of Materials and Optoelectronic Science, Center of Crystal Research, National Sun Yat-Sen University, Kaohsiung 804, Taiwan.

<sup>b</sup>Chemistry Department, Faculty of Science, Assiut University, Assiut, 71516, Egypt.

<sup>c</sup>Department of Chemical Engineering, National Tsing Hua University, Hsinchu 30013, Taiwan.

<sup>d</sup>Department of Chemistry, Faculty of Science, Al-Azhar University, Nasr City 11884, Cairo, Egypt.

<sup>e</sup>Department of Medicinal and Applied Chemistry, Kaohsiung Medical University, Kaohsiung 807, Taiwan.

# These authors contributed equally.

\*To whom correspondence should be addressed

E-mail: [kuosw@faculty.nsysu.edu.tw](mailto:kuosw@faculty.nsysu.edu.tw), and [hhchou@mx.nthu.edu.tw](mailto:hhchou@mx.nthu.edu.tw)

## Characterization

FTIR spectra were recorded using a Bruker Tensor 27 FTIR spectrophotometer and the conventional KBr disk method; 32 scans were collected at a spectral resolution of 4 cm<sup>-1</sup>; the films used in this study were sufficiently thin to obey the Beer–Lambert law. DSC analyses were performed using a TA Q-20 DSC apparatus; all samples were placed in hermetic Al pans with lids and heated from 40 to 350 °C at a heating rate of 20 °C min<sup>-1</sup> under a N<sub>2</sub> flow rate of 50 mL min<sup>-1</sup>. Wide-angle X-ray diffraction (WAXD) patterns were recorded using the wiggler beamline BL17A1 of the National Synchrotron Radiation Research Center (NSRRC), Taiwan; a triangular bent Si (111) single crystal was used to obtain a monochromated beam having a wavelength ( $\lambda$ ) of 1.33 Å. A triangular bent Si (111) single crystal was used to obtain a monochromated beam having a wavelength ( $\lambda$ ) of 1.33 Å. Cross-polarization with MAS (CP/MAS) was used to acquire <sup>13</sup>C NMR spectral data at 75.5 MHz. The CP contact time was 2 ms; <sup>1</sup>H decoupling was applied during data acquisition. The decoupling frequency corresponded to 32 kHz. The MAS sample spinning rate was 10 kHz. TEM images were recorded using a JEOL JEM-2010 instrument operated at 200 kV. FE-SEM was conducted using a JEOL JSM7610F scanning electron microscope; samples were subjected to Pt sputtering for 100 s prior to observation. BET surface area and porosimetry measurements of the prepared samples (ca. 40–100 mg) were performed using BEL Master<sup>TM</sup> and BEL sim<sup>TM</sup> (v. 3.0.0). Nitrogen isotherms were generated through incremental exposure to ultrahigh-purity N<sub>2</sub> (up to ca. 1 atm) in a liquid N<sub>2</sub> bath (77 K). Surface parameters were determined using BET adsorption models in the instrument's software. TGA was performed using a TA Q-50 analyzer under a flow of N<sub>2</sub>; the samples were sealed

in a Pt cell and heated from 40 to 800 °C at a heating rate of 20 °C min<sup>-1</sup> under a N<sub>2</sub> flow of 60 mL min<sup>-1</sup>. UV–Vis spectra were recorded at 25 °C using a Jasco V-570 spectrometer, with EtOH as the solvent.

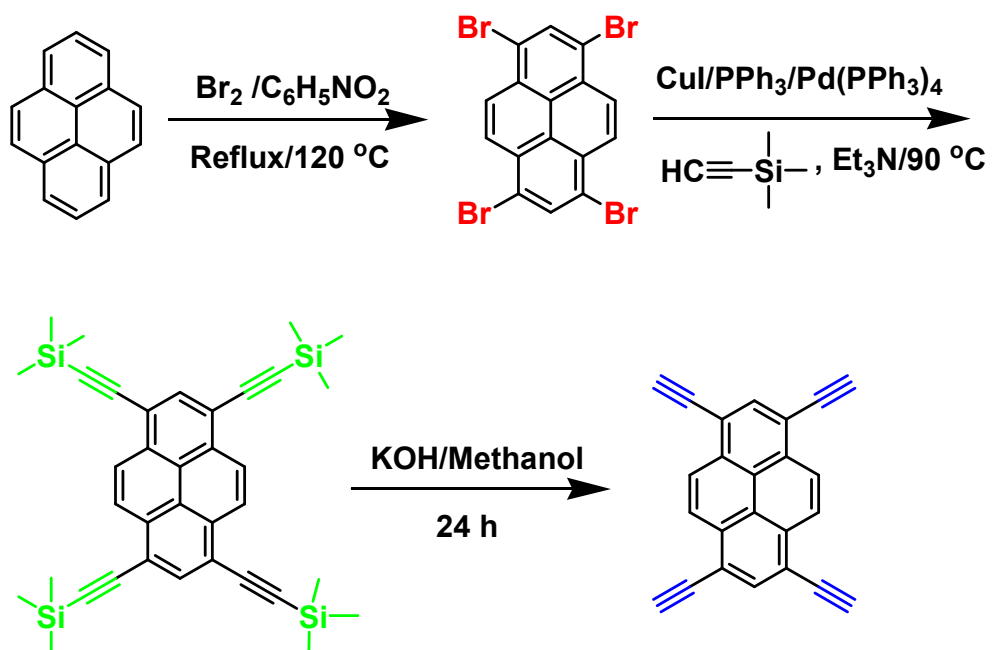

**Scheme S1.** Synthesis of Py-Br<sub>4</sub>, Py-TMS and Py-T.

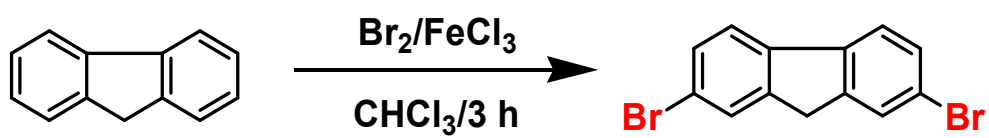

**Scheme S2.** Synthesis of F-Br<sub>2</sub>.

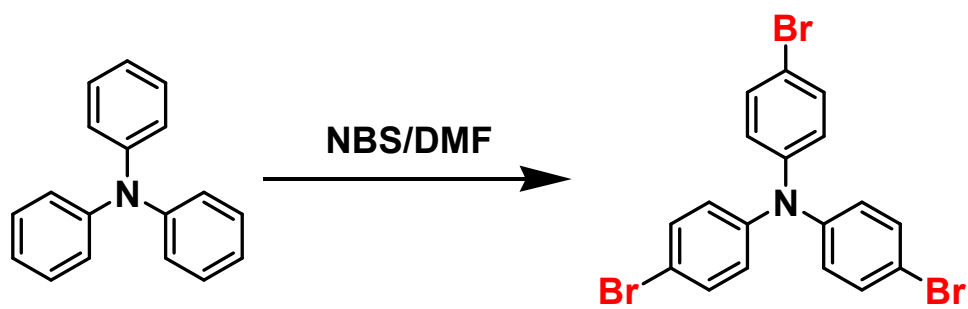

**Scheme S3.** Synthesis of TPA-Br<sub>3</sub>.

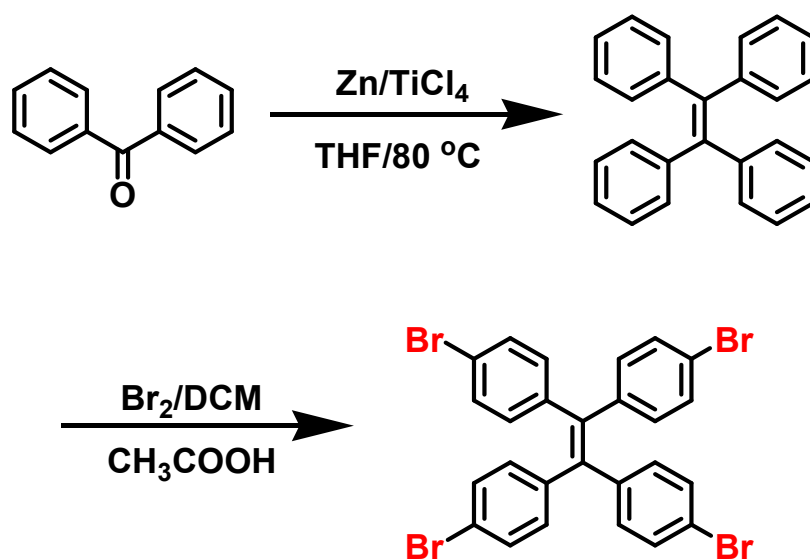

**Scheme S4.** Synthesis of TPE and TPE-Br<sub>4</sub>.

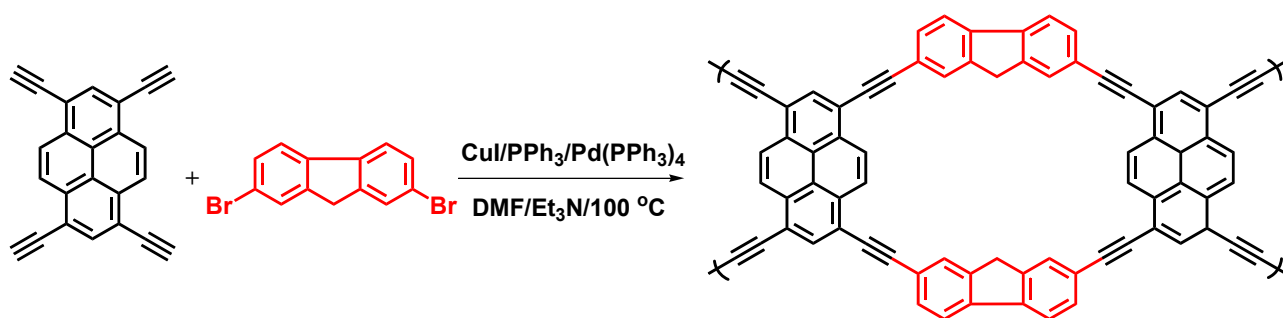

**Scheme S5.** Synthesis of Py-F-CMP.



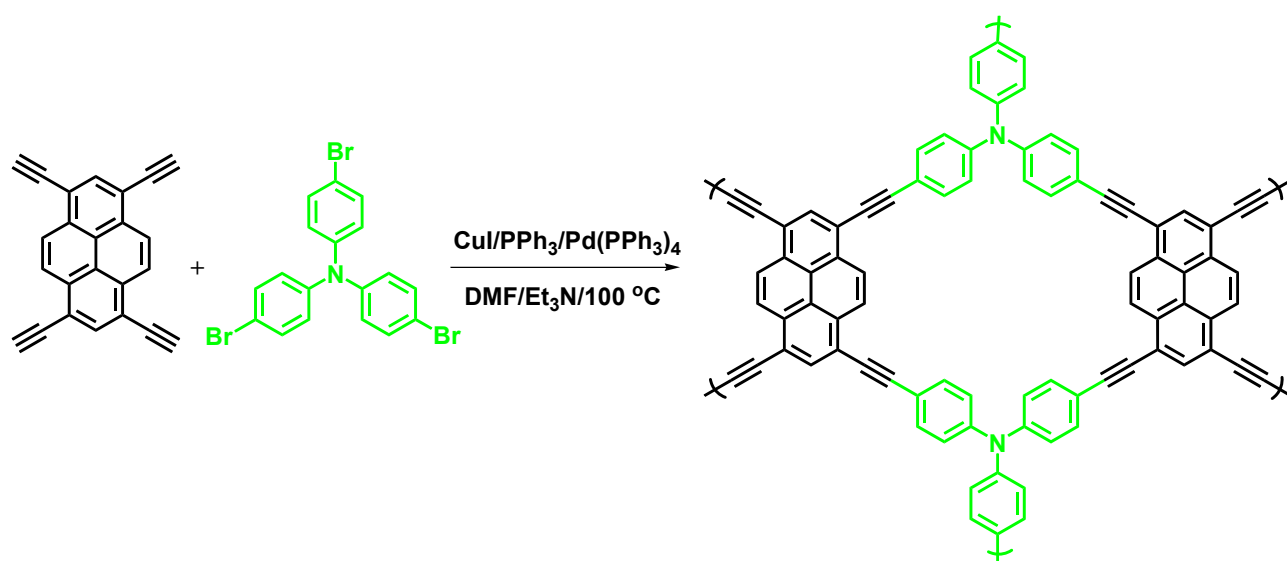

**Scheme S6.** Synthesis of Py-TPA-CMP.

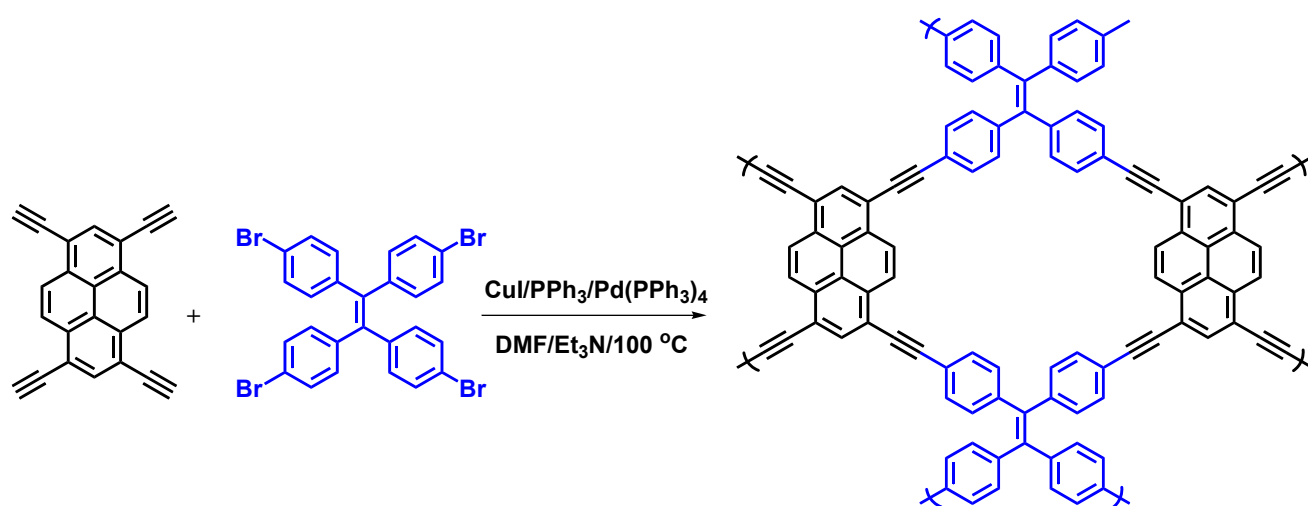

**Scheme S7.** Synthesis of Py-TPE-CMP.

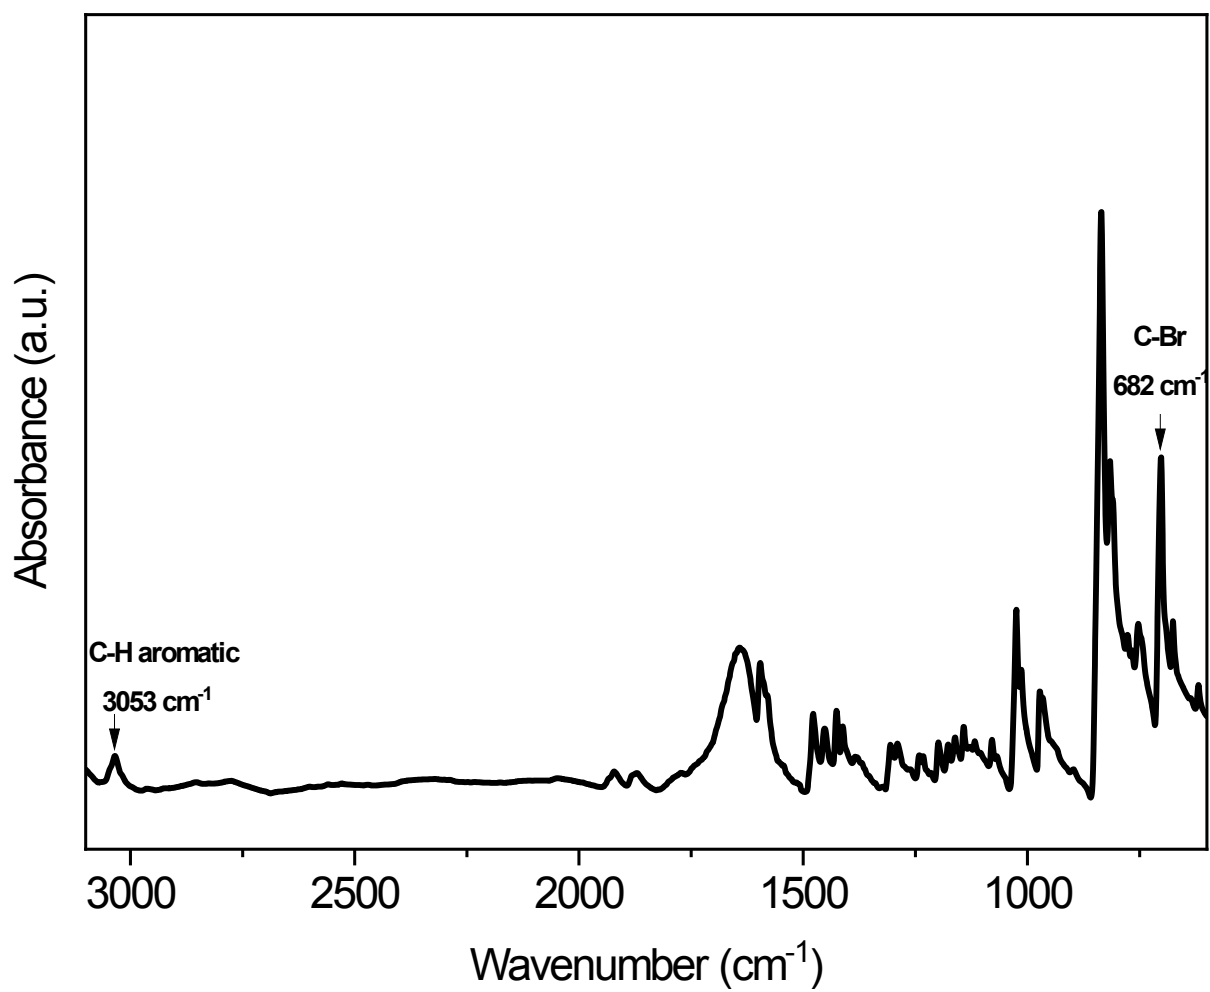

Figure

e S1. FT-IR spectrum of Py-Br<sub>4</sub>.

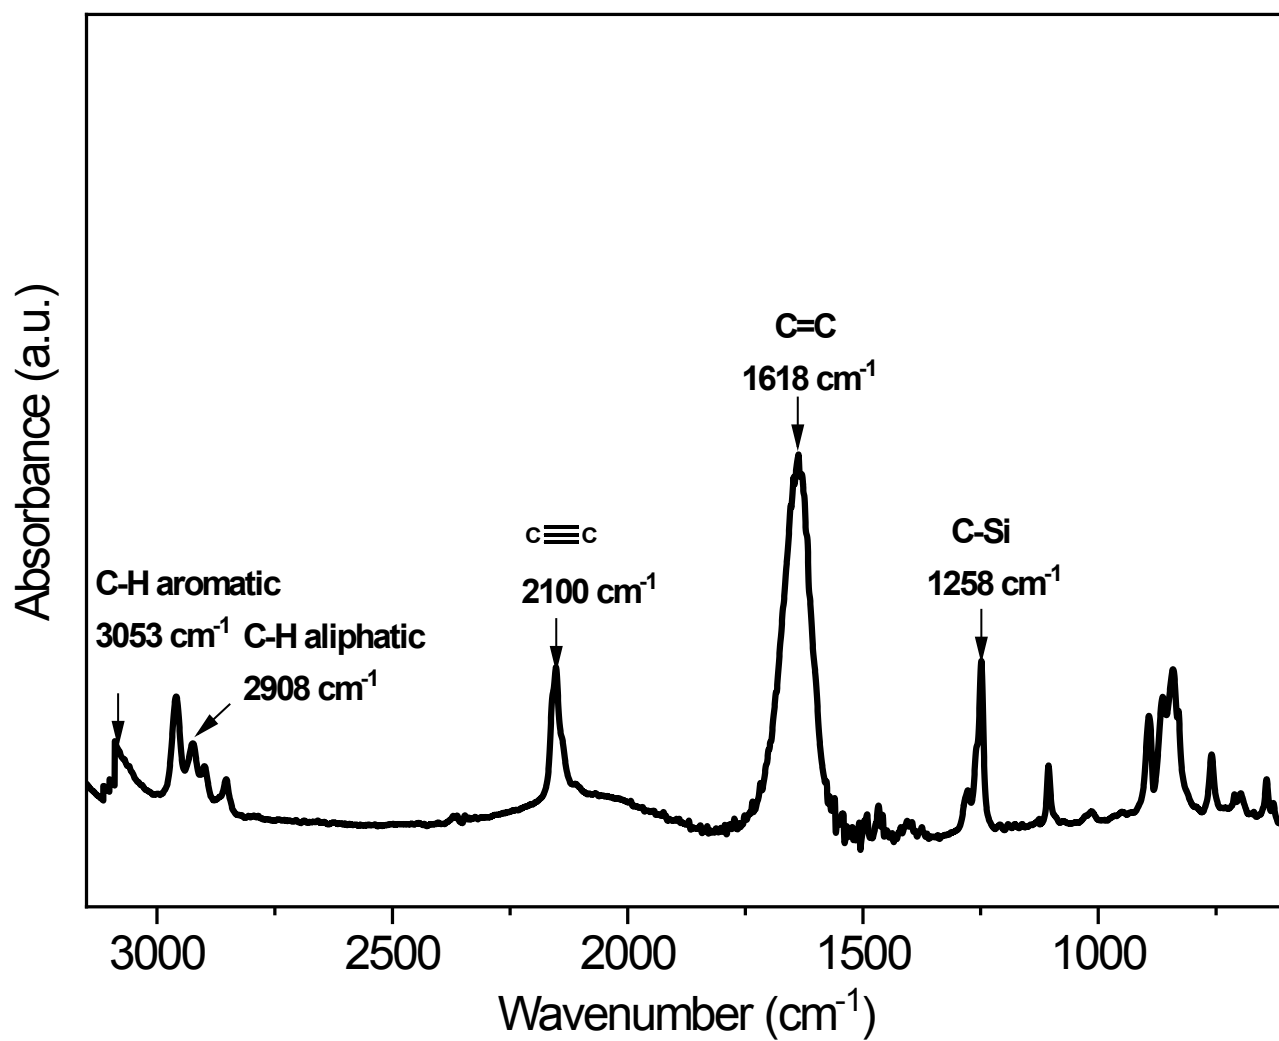

**Figure S2.** FT-IR spectrum of Py-TMS.

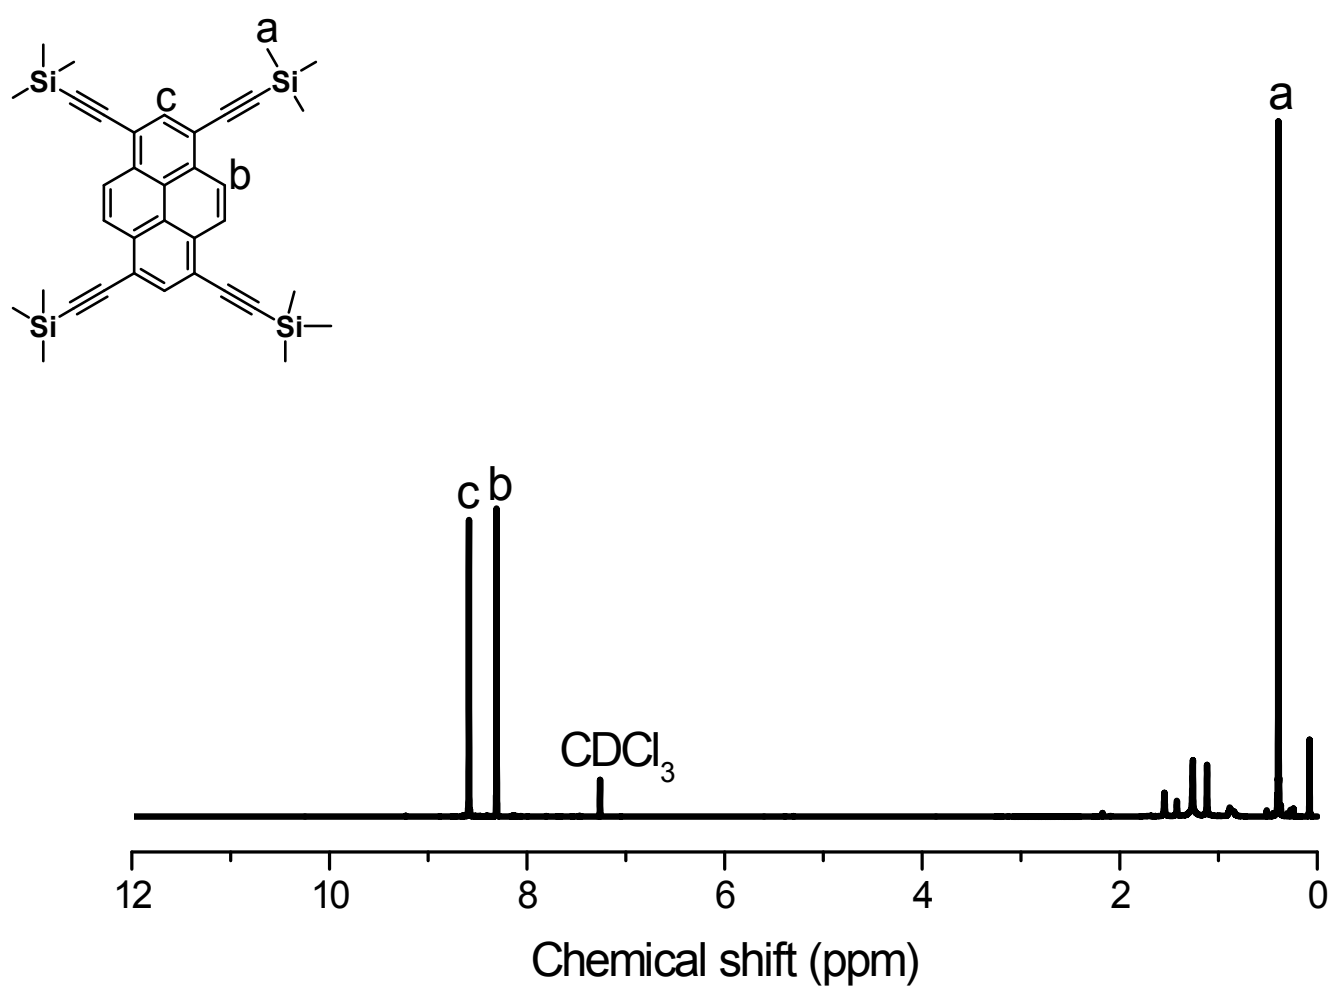

**Figure S3.**  $^1\text{H}$  NMR spectrum of Py-TMS.

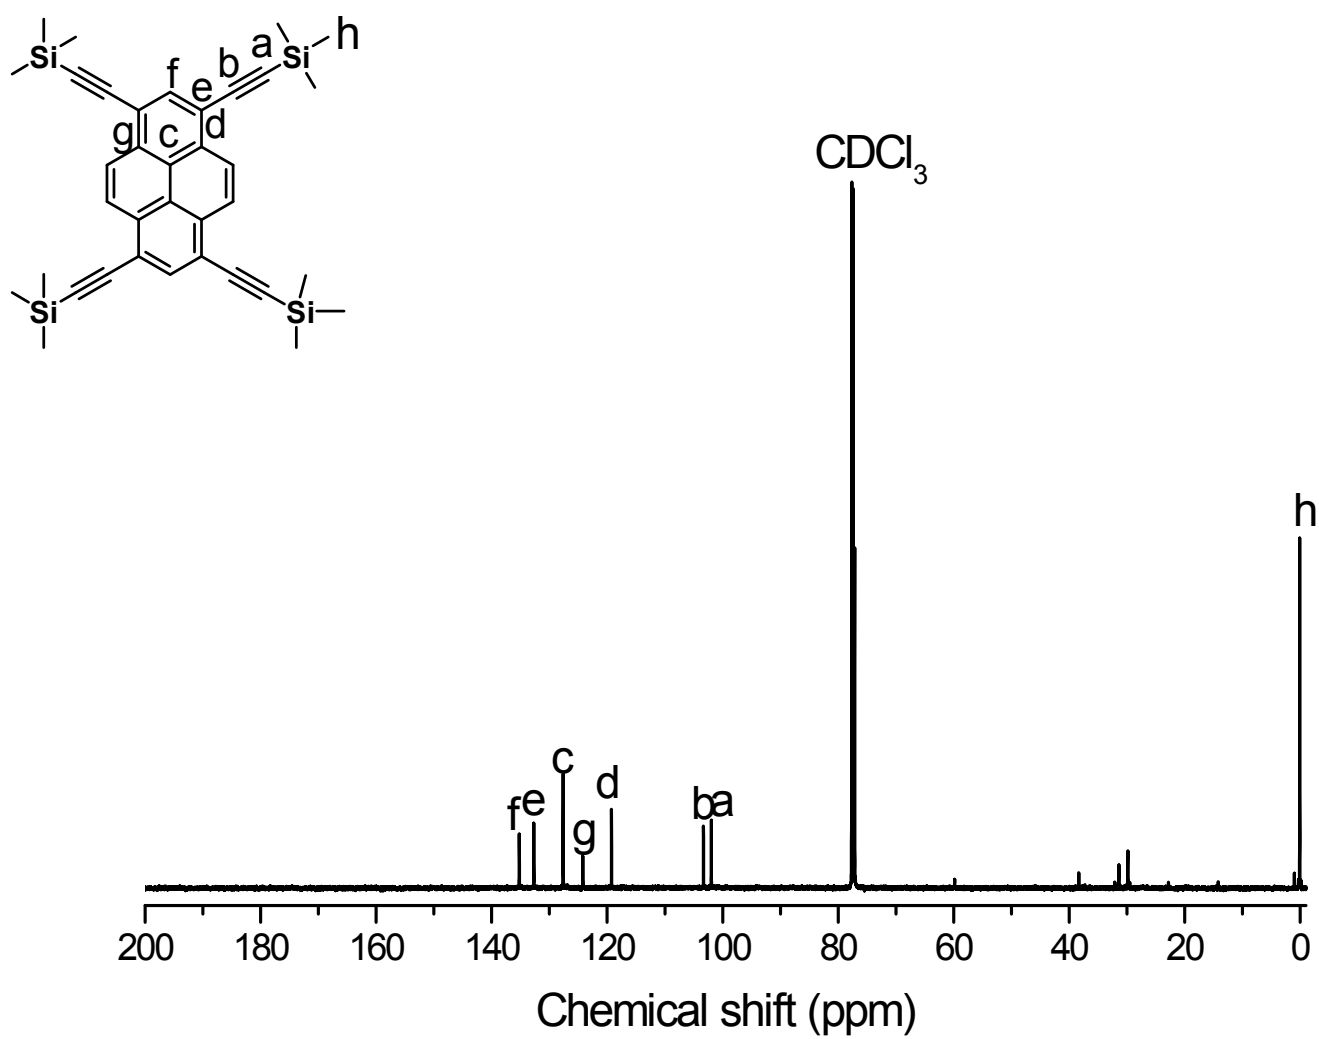

**Figure S4.**  $^{13}\text{C}$  NMR spectrum of Py-TMS.

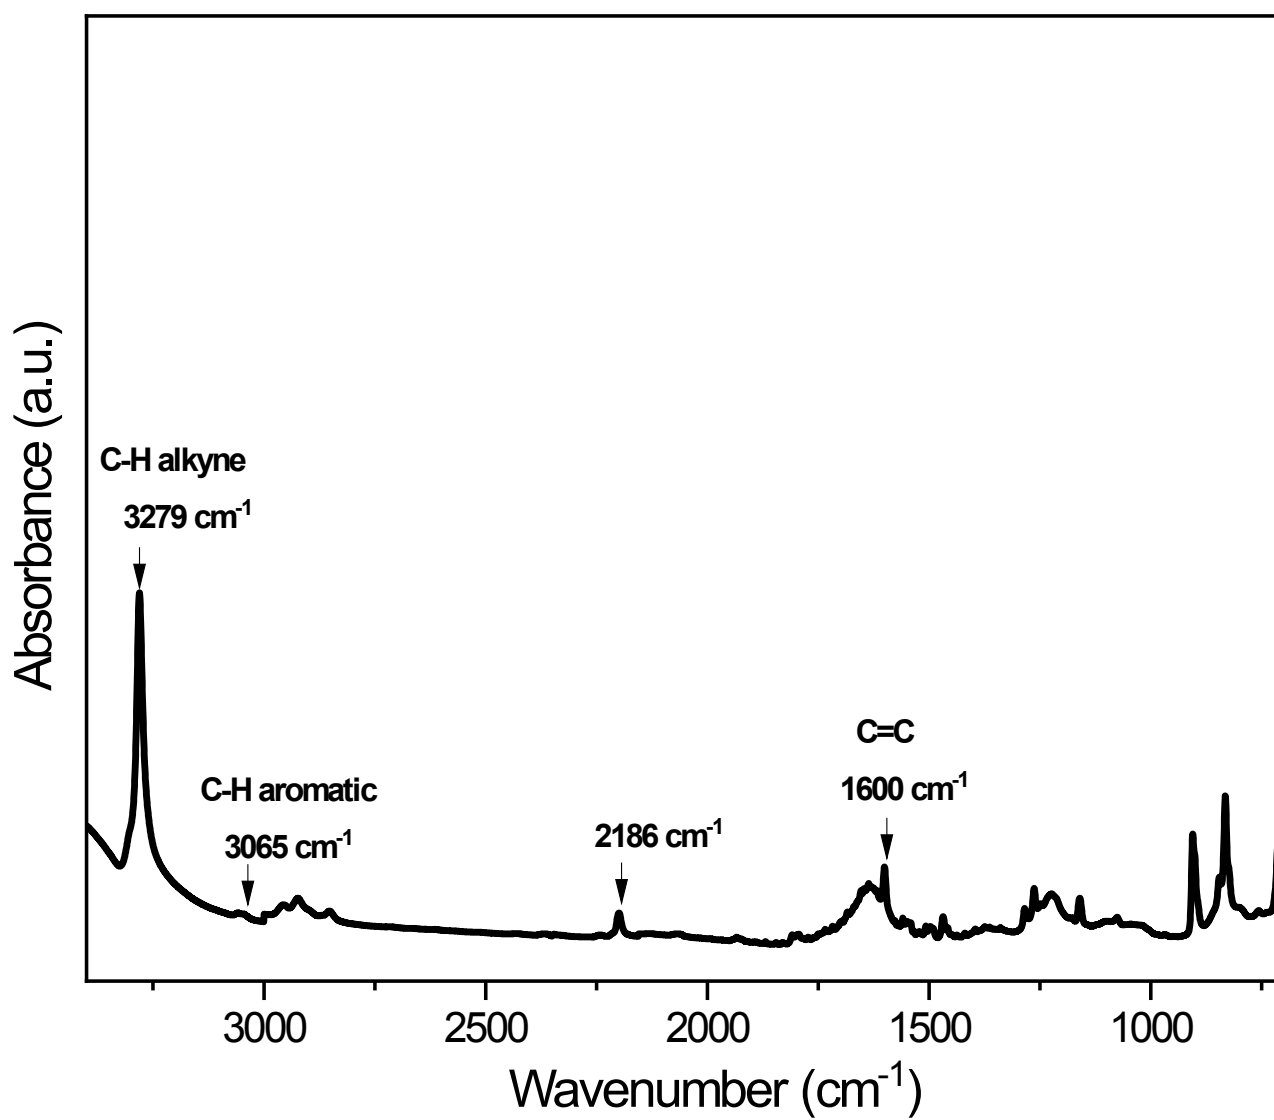

**Figure S5.** FT-IR spectrum of Py-T.

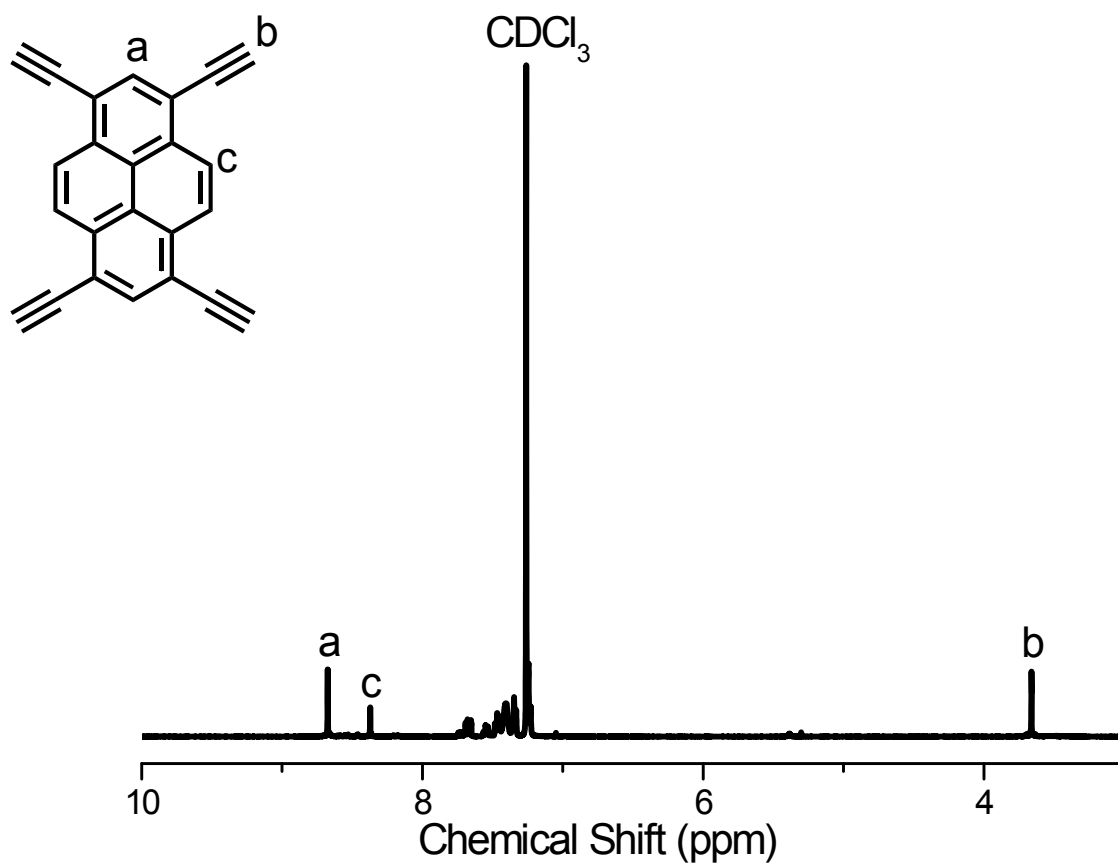

**Figure S6.**  $^1\text{H}$  NMR spectrum of Py-T.



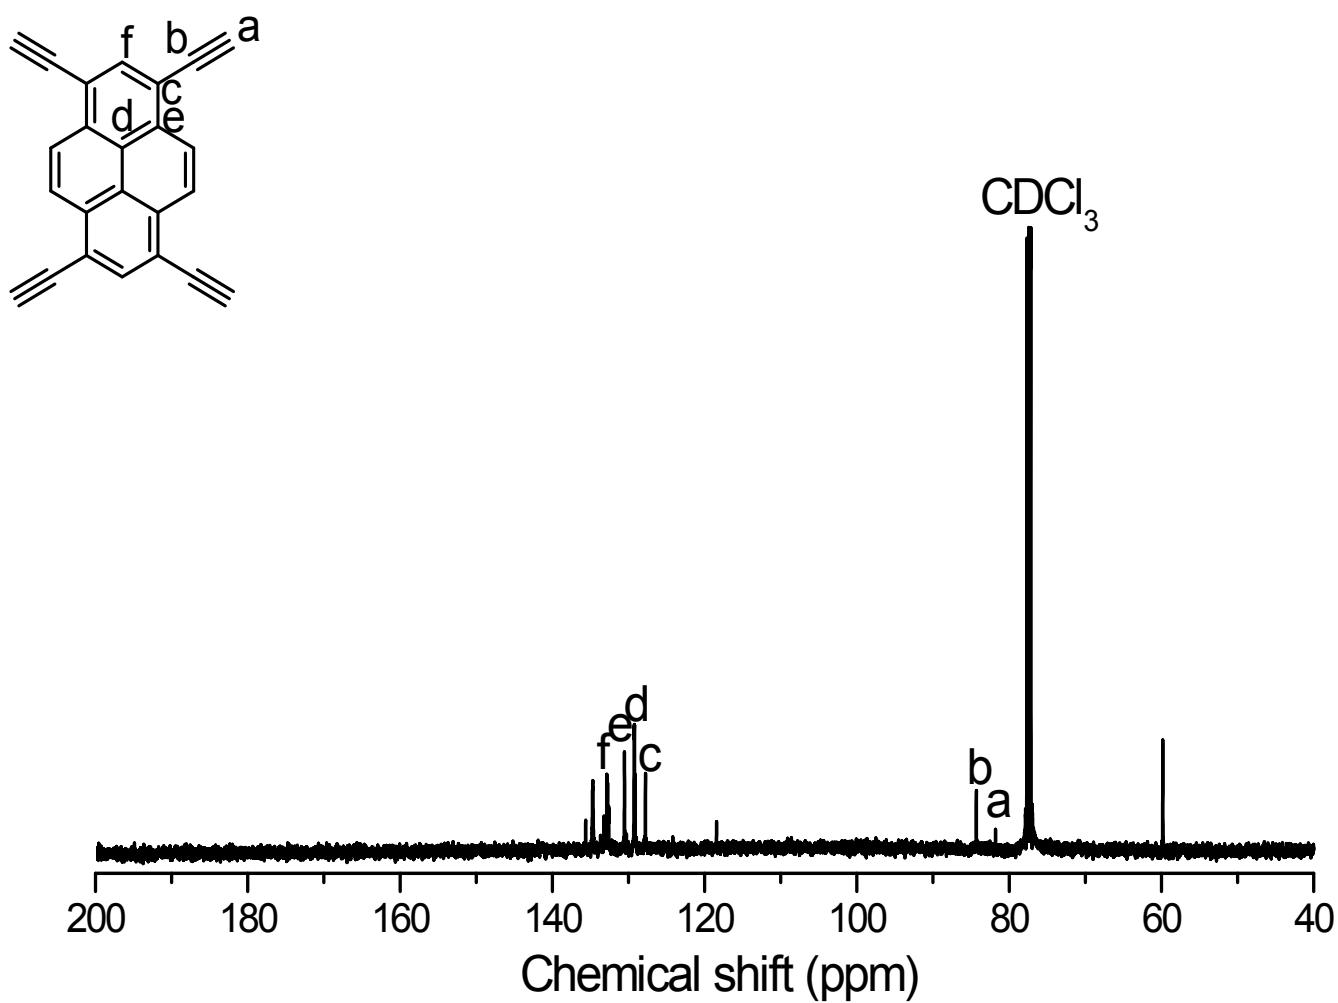

**Figure S7.**  $^{13}\text{C}$  NMR spectrum of Py-T.

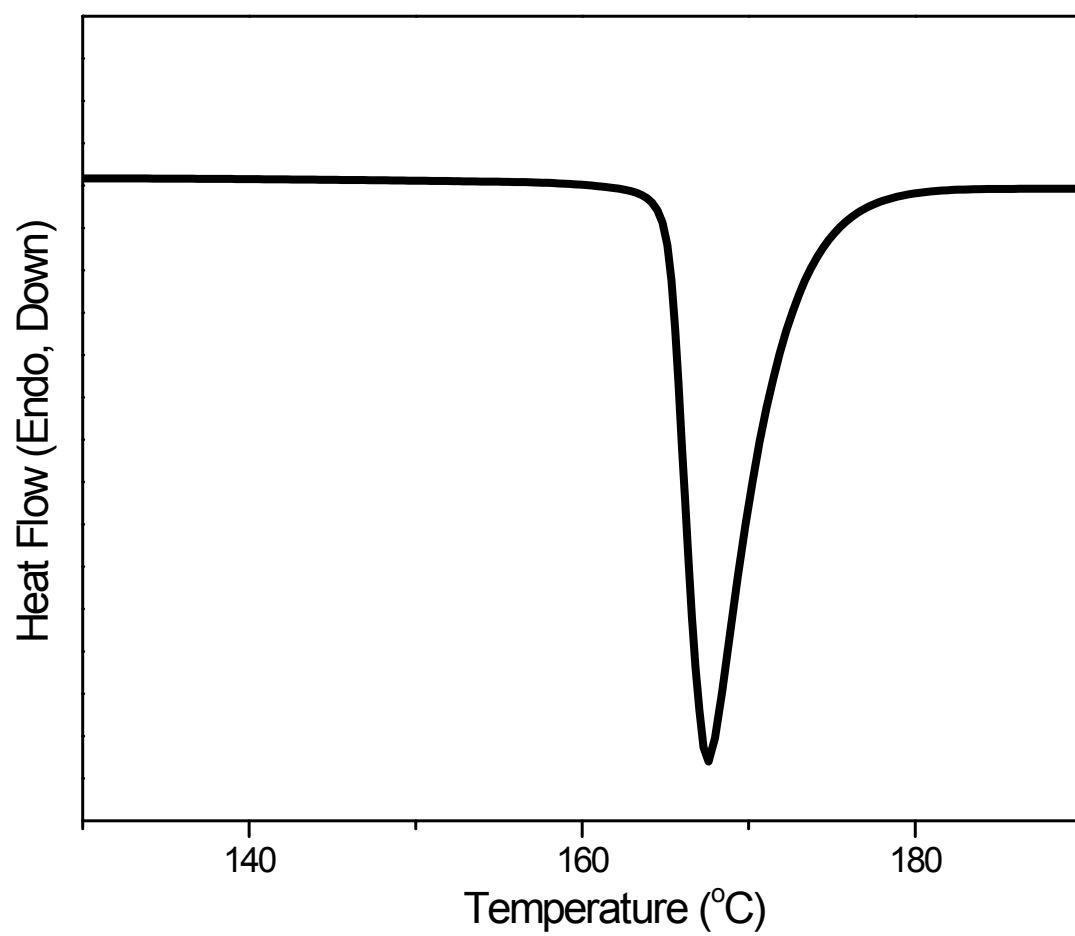

**Figure S8.** DSC profile of F-Br<sub>2</sub>.

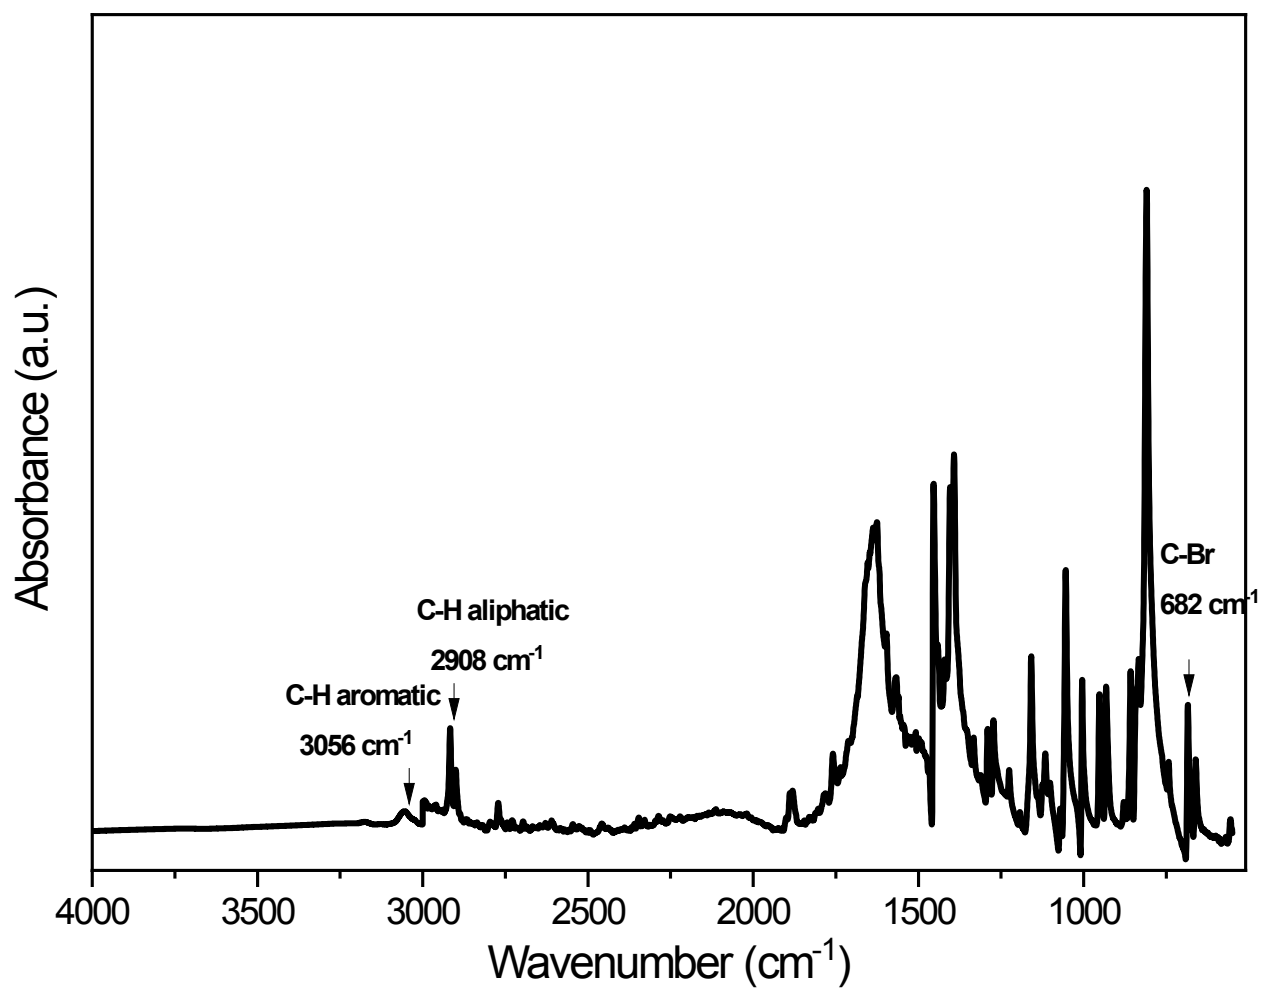

**Figure S9.** FT-IR spectrum of F-Br<sub>2</sub>.

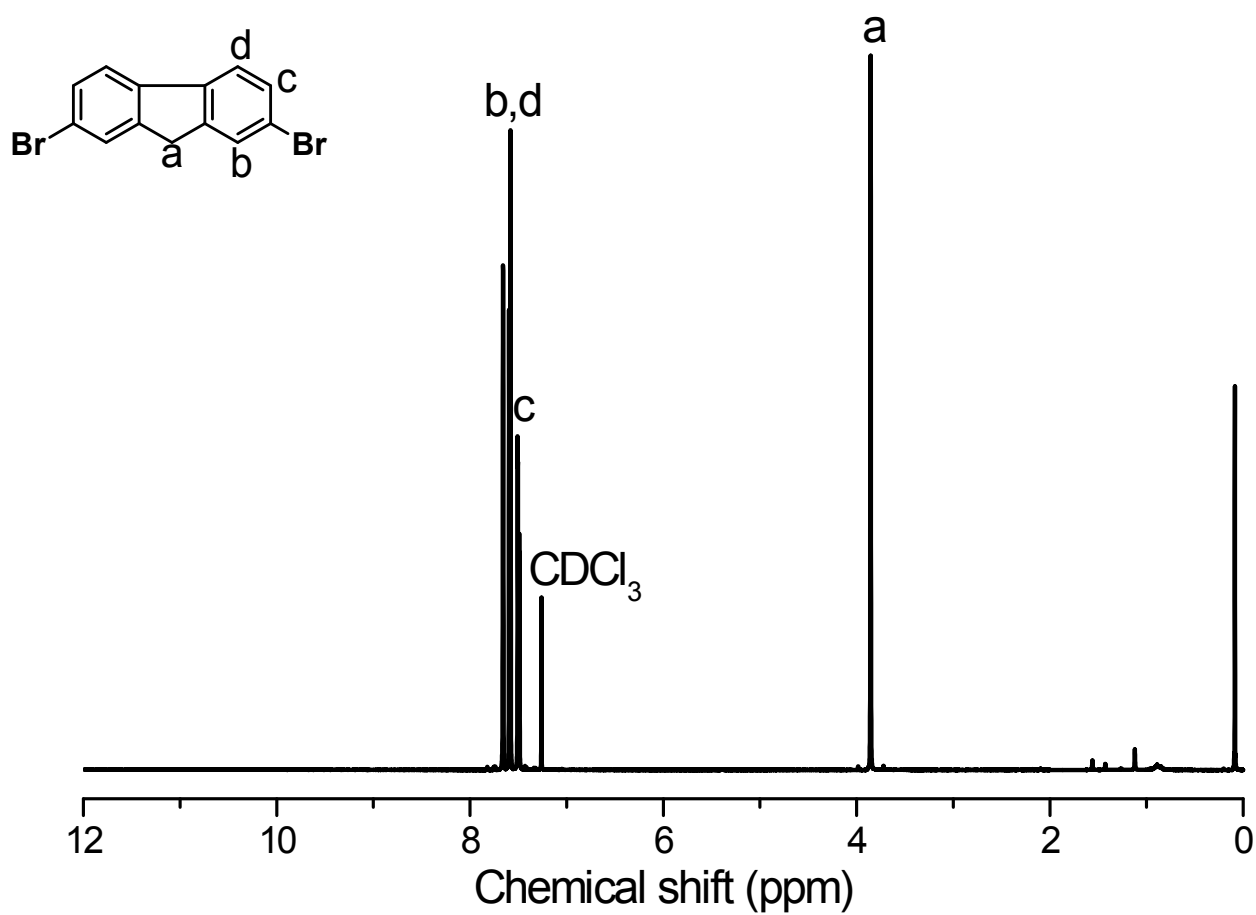

**Figure S10.**  $^1\text{H}$  NMR spectrum of F-Br<sub>2</sub>.

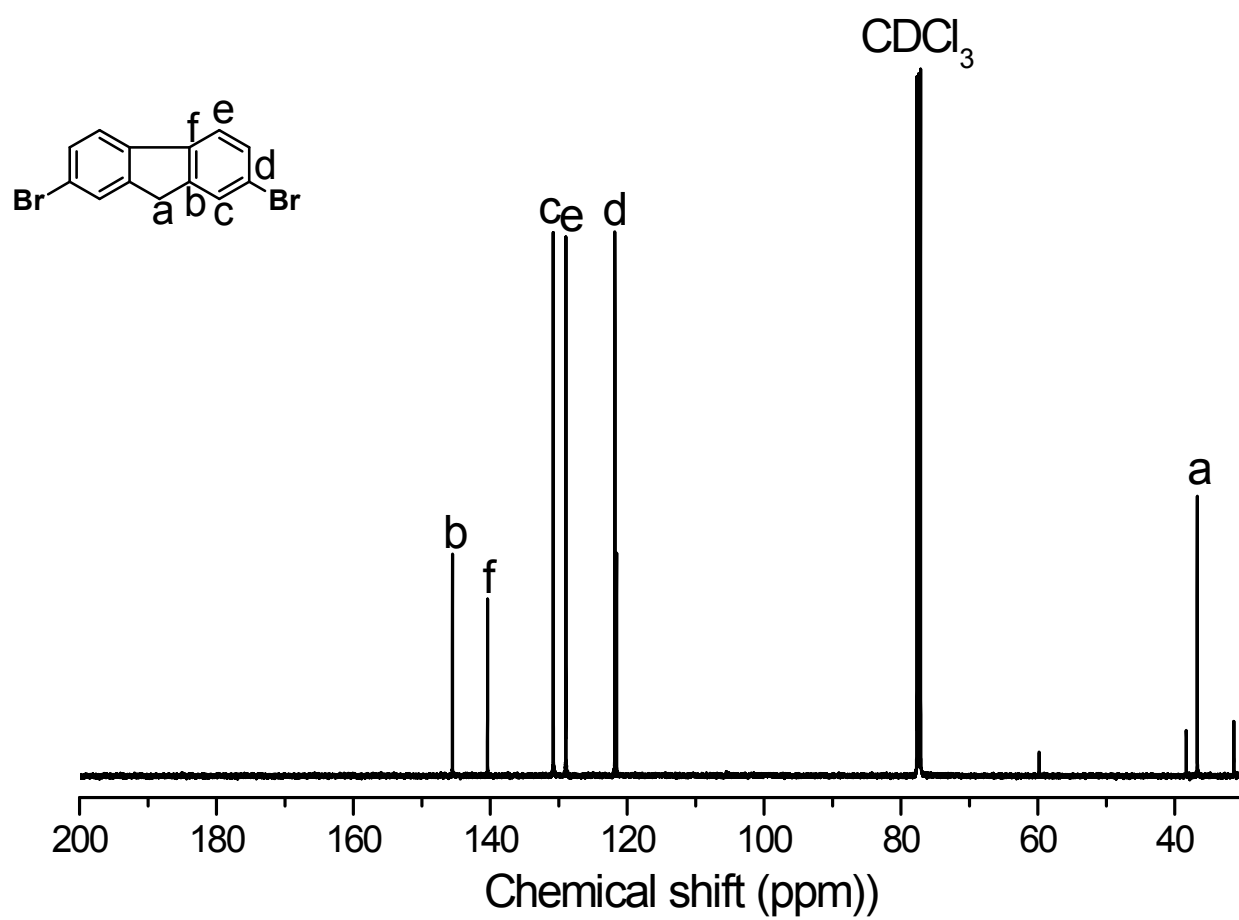

**Figure S11.**  $^{13}\text{C}$  NMR spectrum of F-Br<sub>2</sub>.

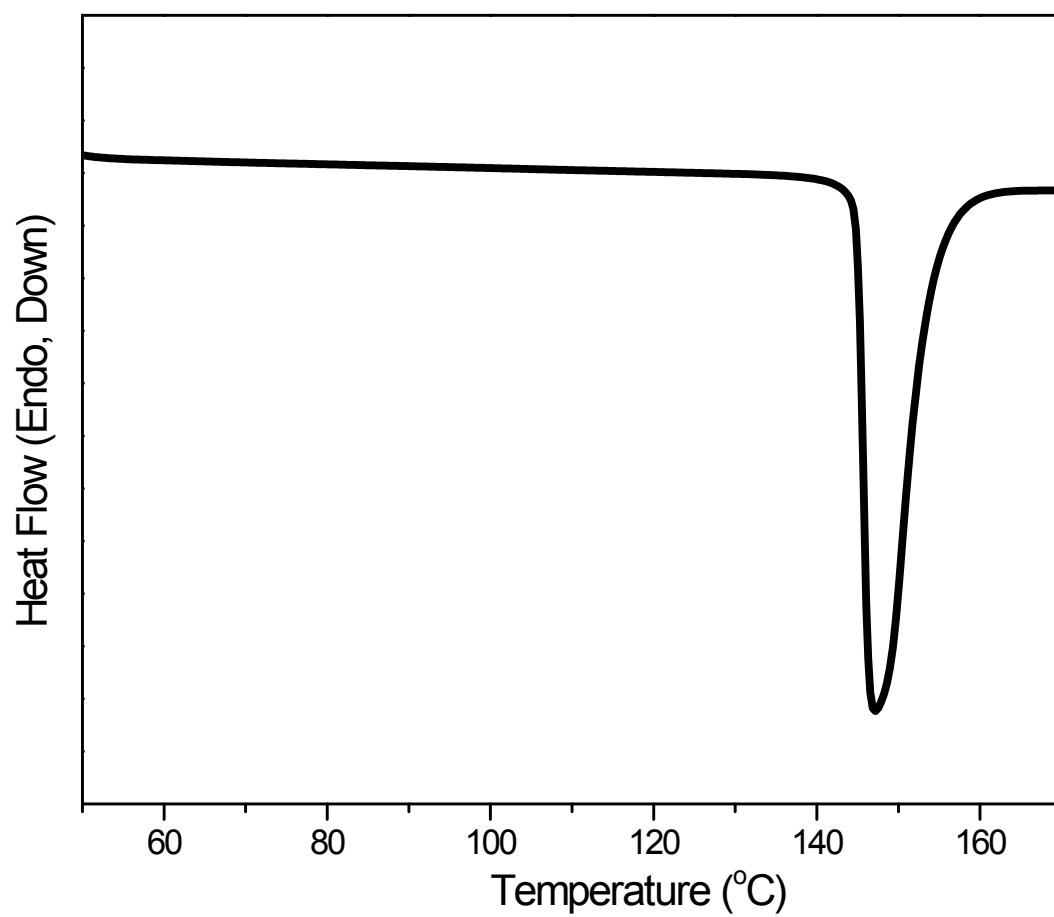

**Figure S12.** DSC profile of TPA-Br<sub>3</sub>.

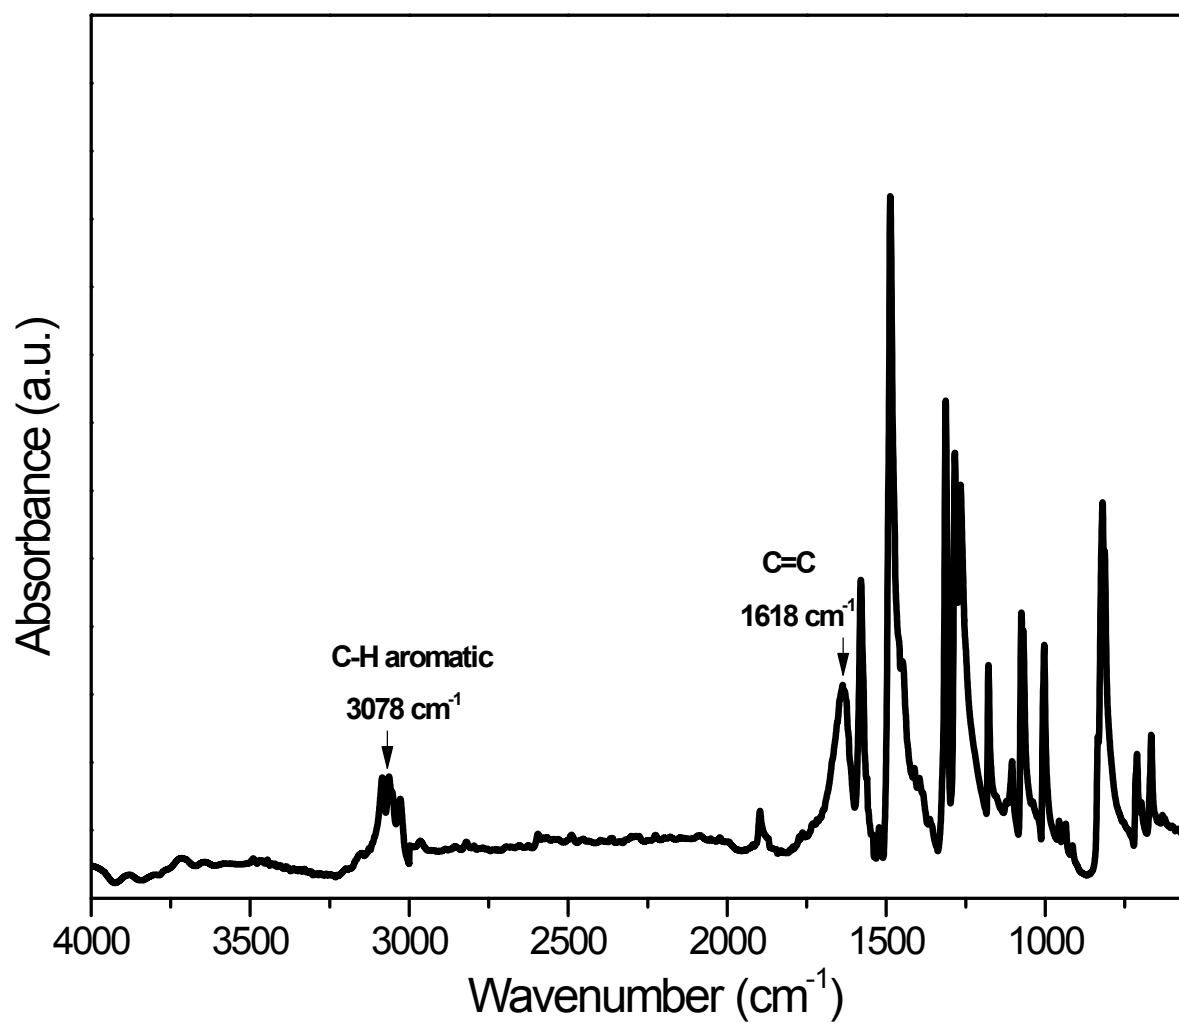

**Figure S13.** FT-IR spectrum of TPA-Br<sub>3</sub>.

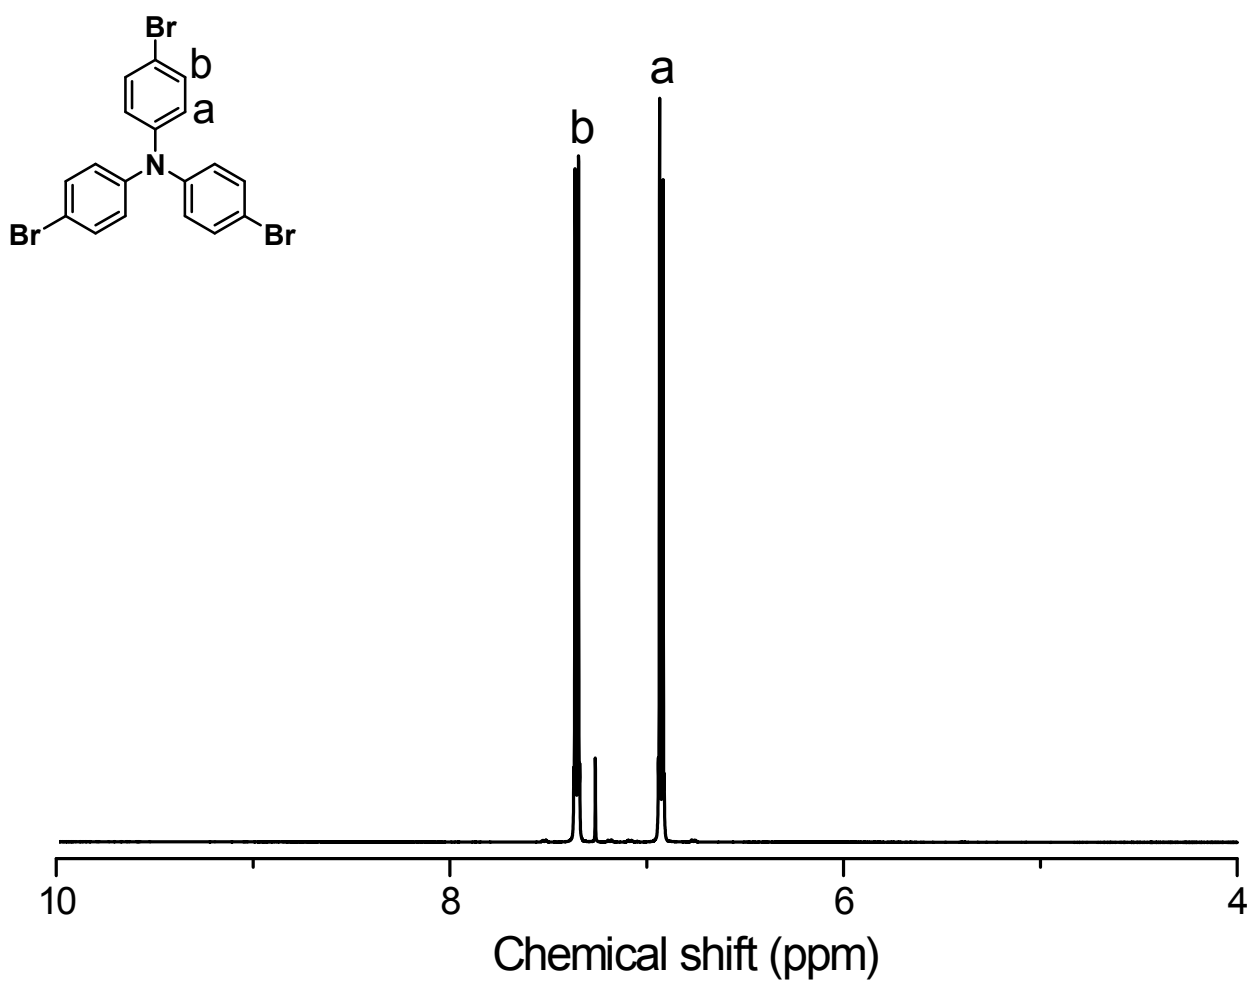

**Figure S14.** <sup>1</sup>H NMR spectrum of TPA-Br<sub>3</sub>.



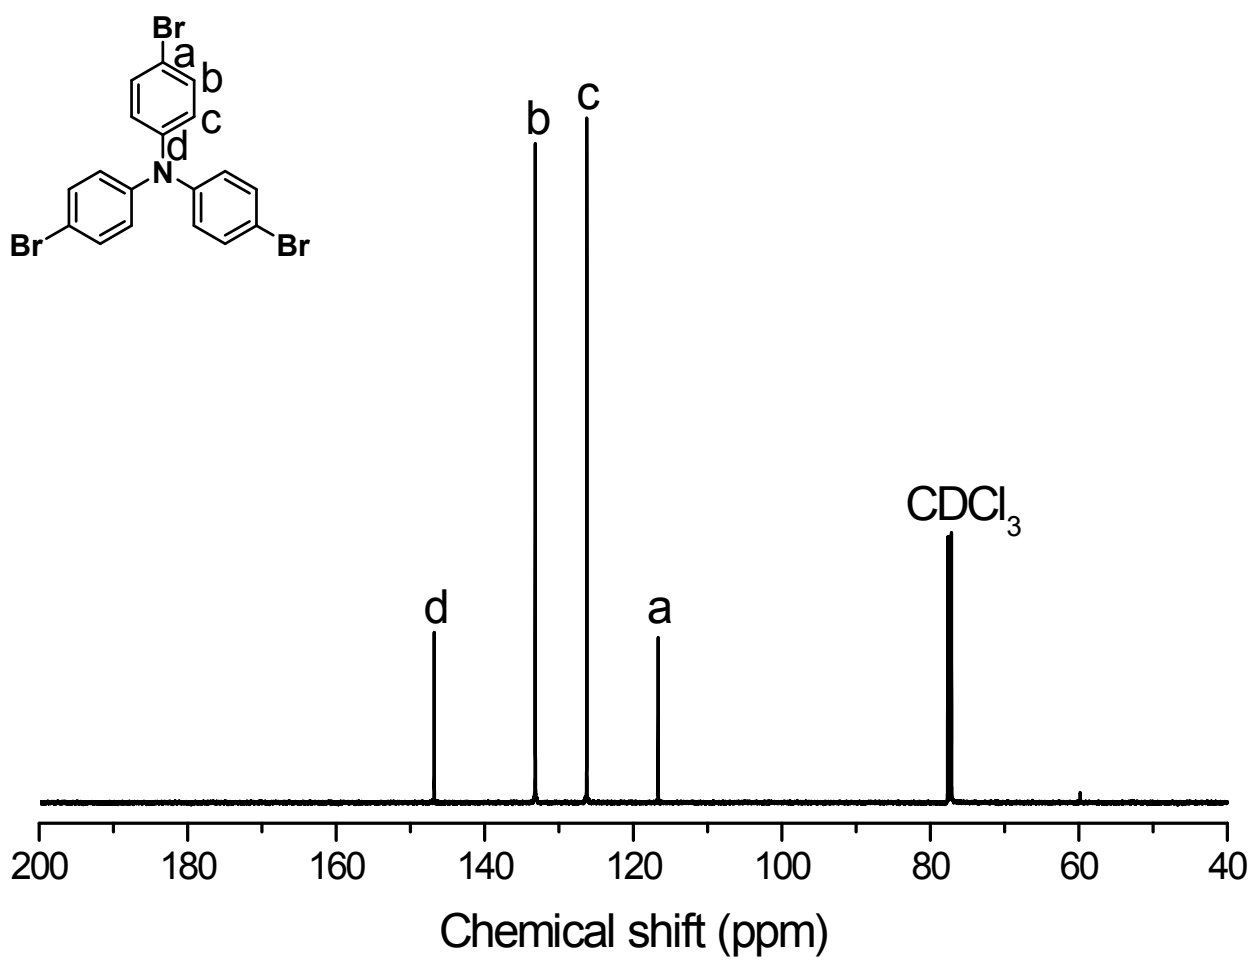

**Figure S15.** <sup>13</sup>C NMR spectrum of TPA-Br<sub>3</sub>.

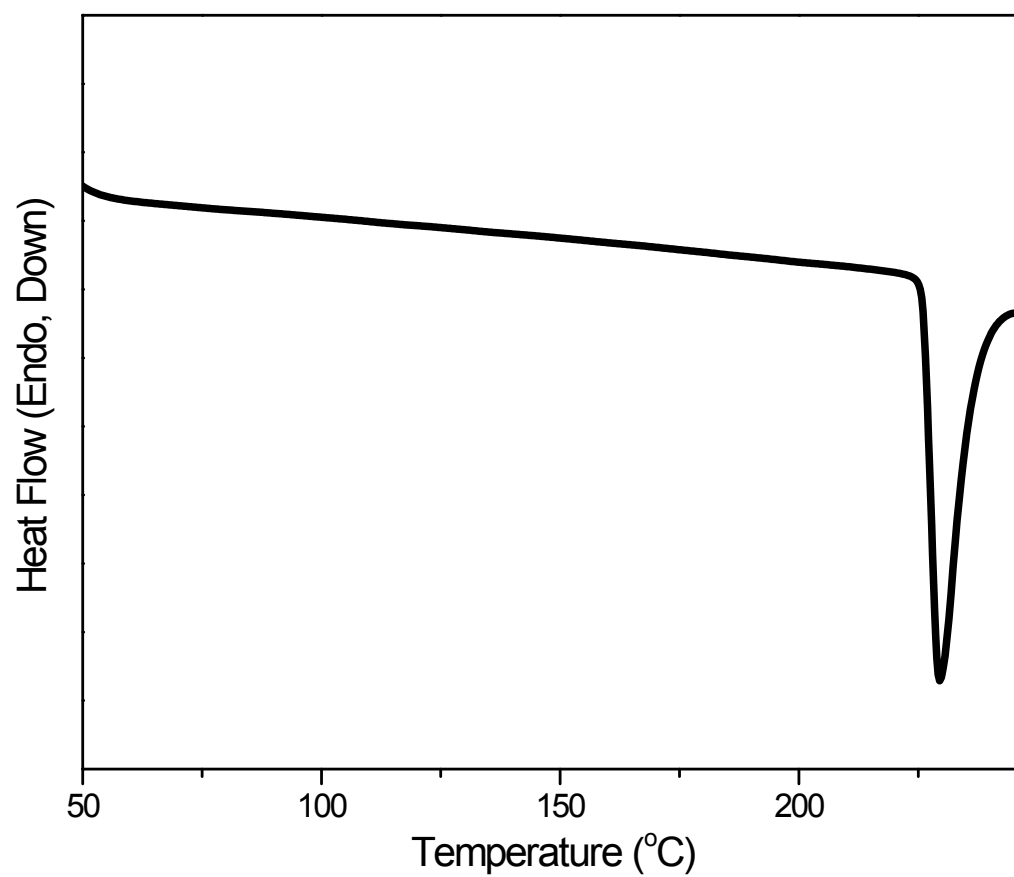

**Figure S16.** DSC profile of TPE.

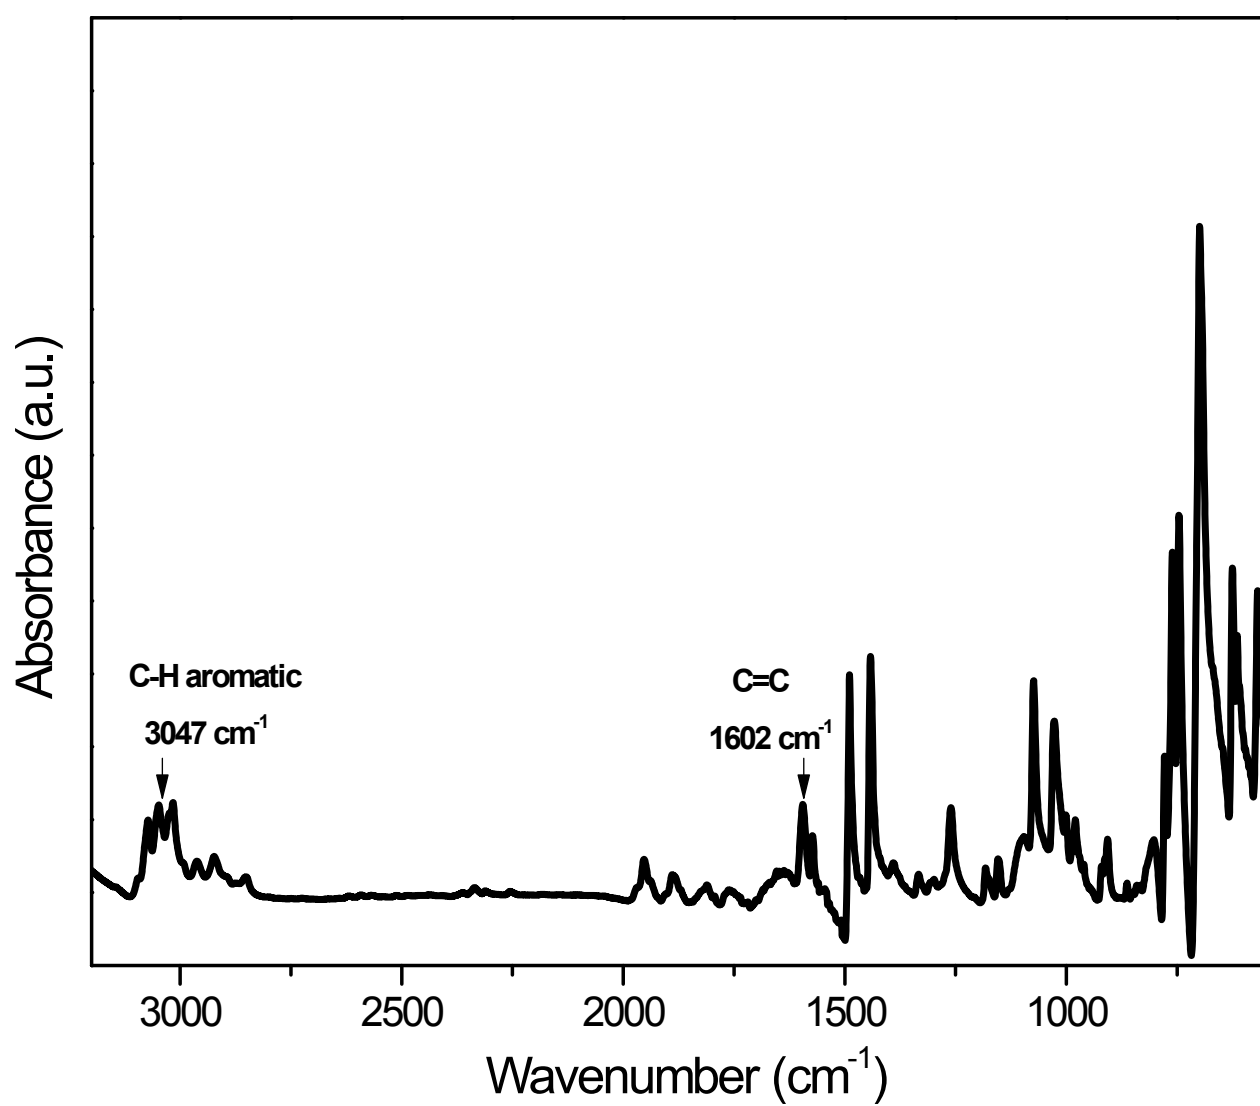

**Figure S17.** FT-IR spectrum of TPE.

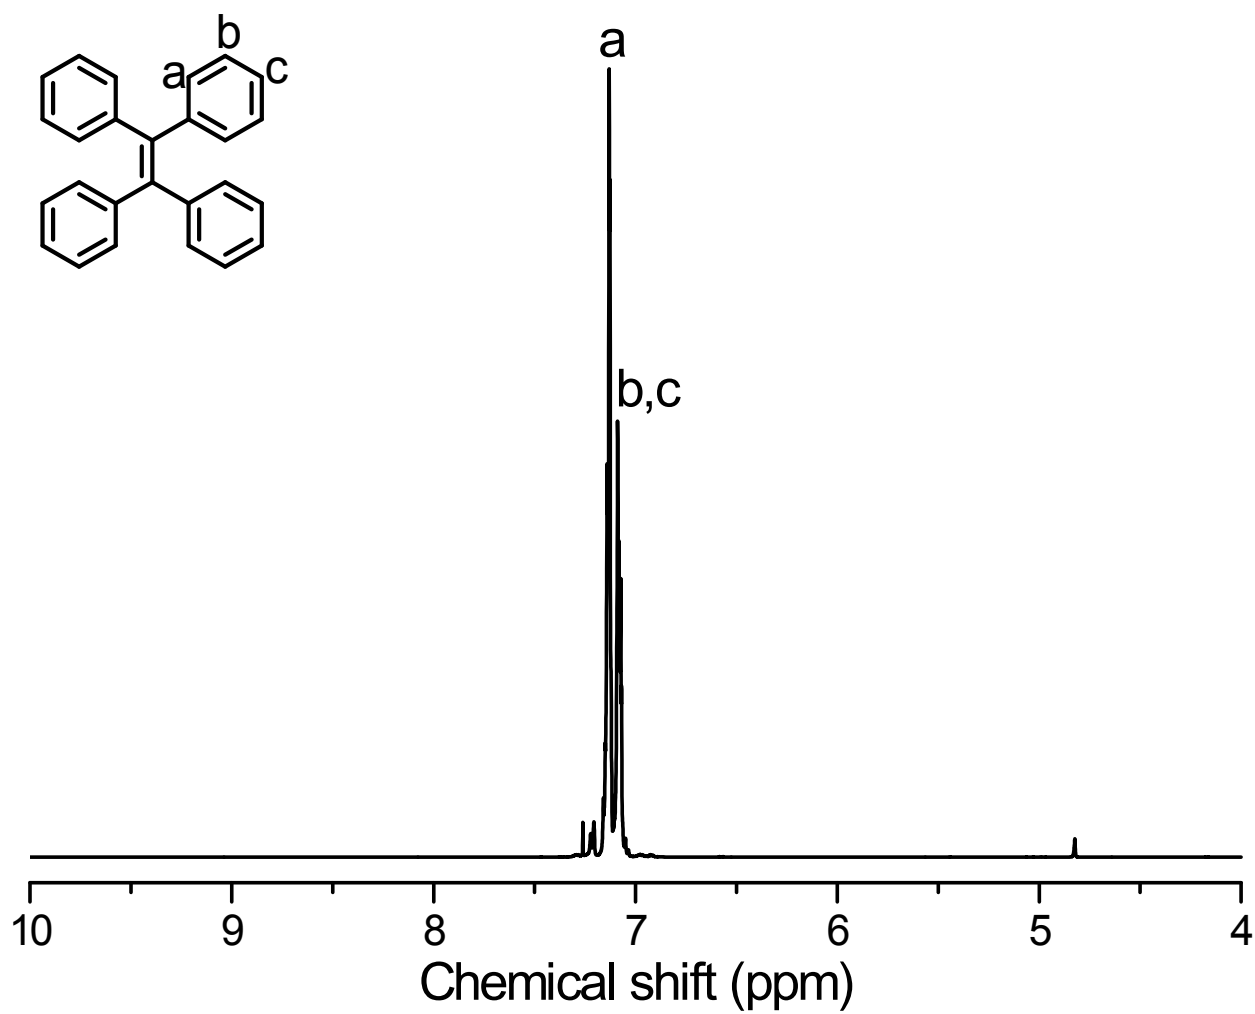

**Figure S18.**  $^1\text{H}$  NMR spectrum of TPE.

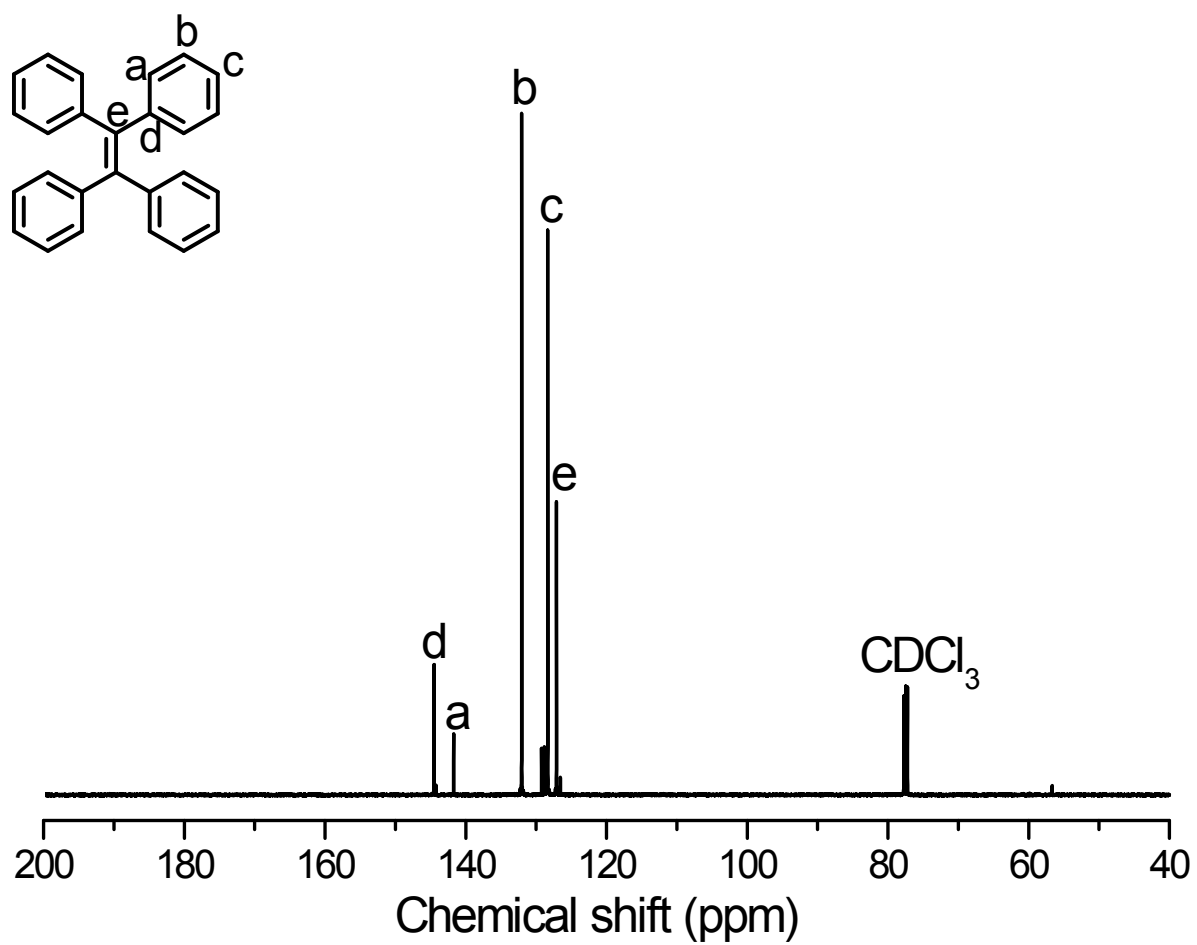

**Figure S19.** <sup>13</sup>C NMR spectrum of TPE.

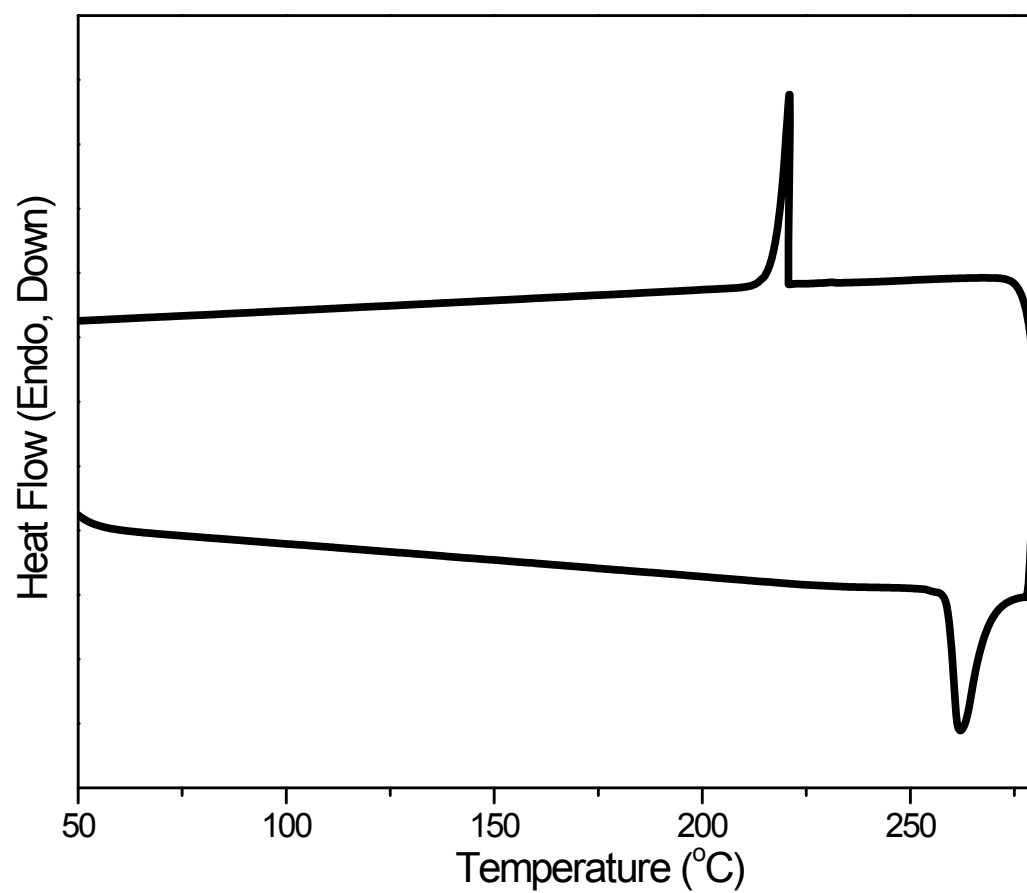

**Figure S20.** DSC profile of TPE-Br<sub>4</sub>.

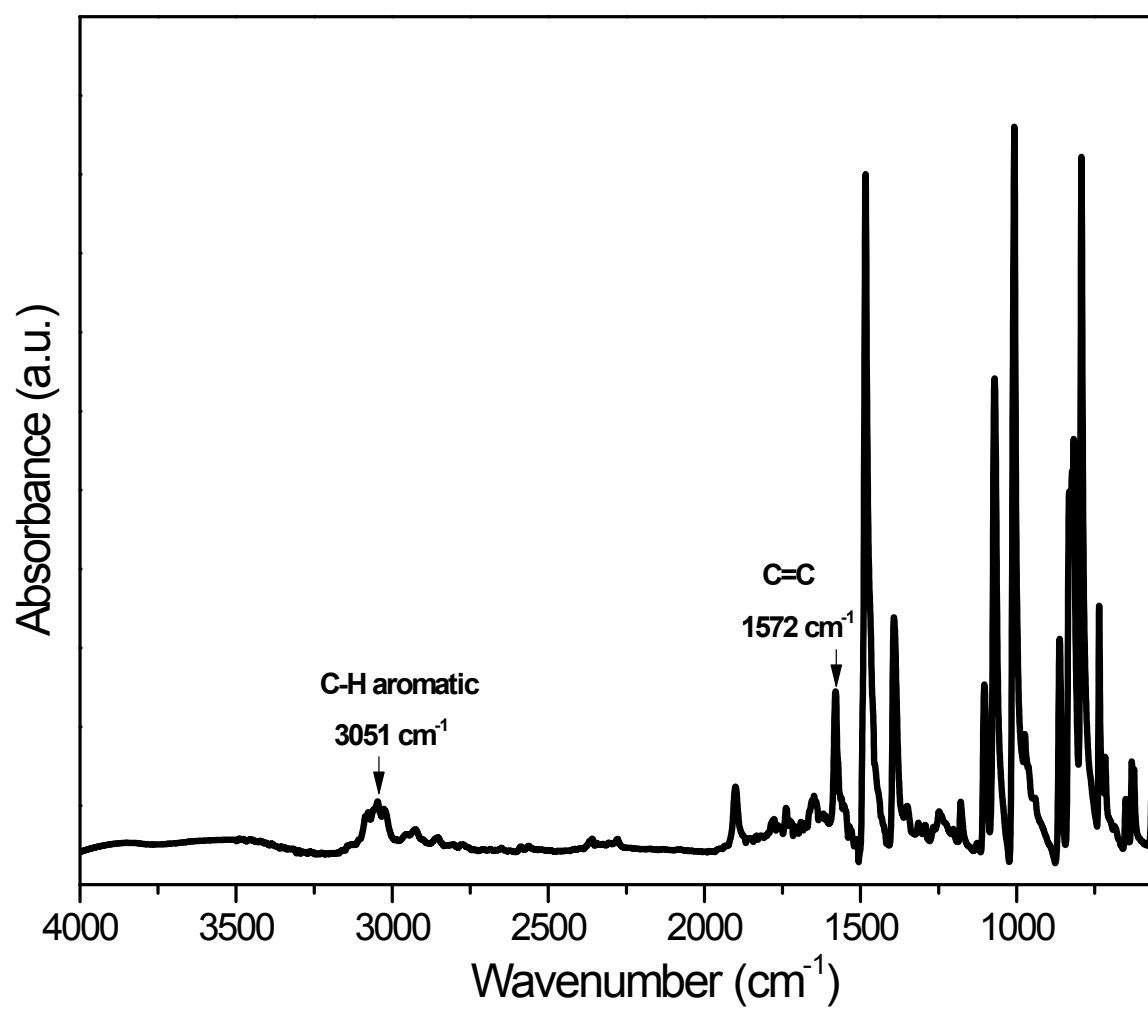

**Figure S21.** FT-IR spectrum of TPE-Br<sub>4</sub>.

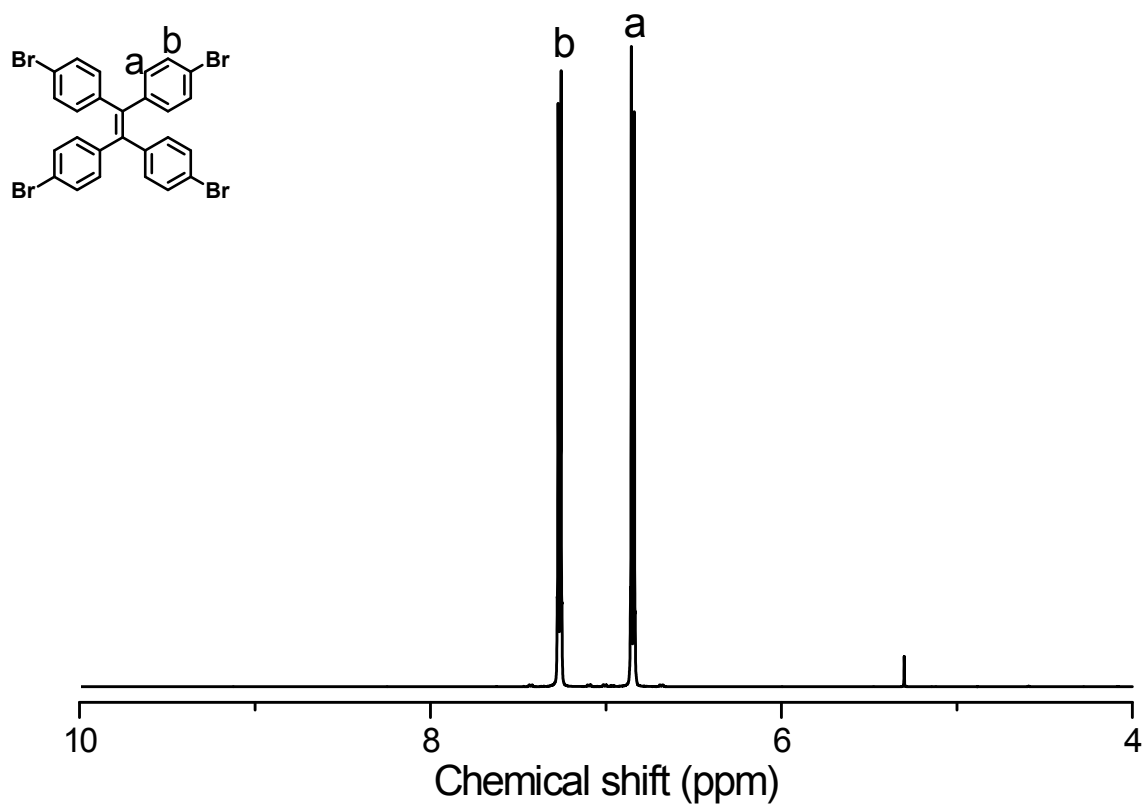

**Figure S22.**  $^1\text{H}$  NMR spectrum of TPE- $\text{Br}_4$ .



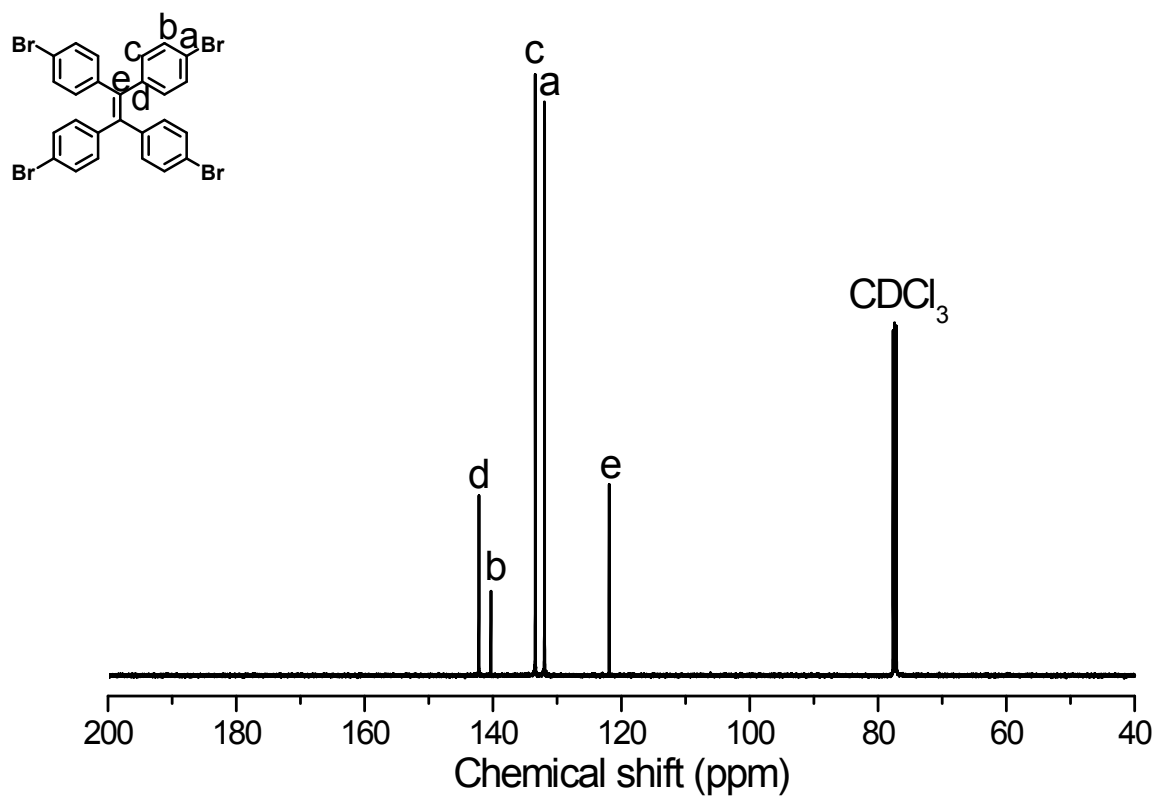

**Figure S23.**  $^{13}\text{C}$  NMR spectrum of TPE- $\text{Br}_4$ .

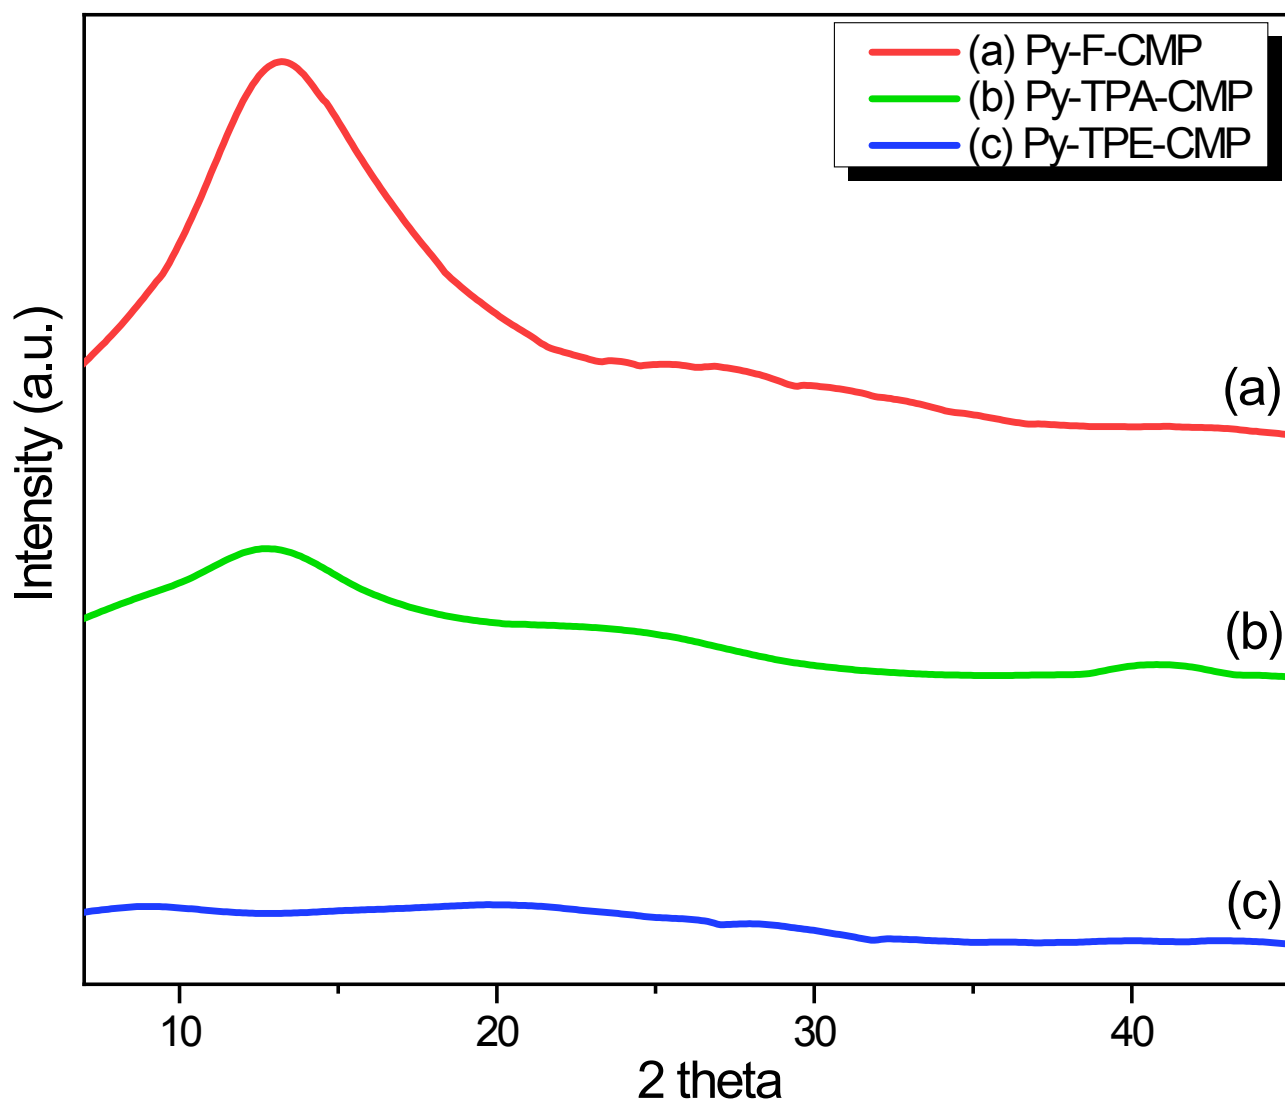

**Figure S24.** XRD profile of (a) Py-F-CMP, (b) Py-TPA-CMP and (c) Py-TPE-CMP.

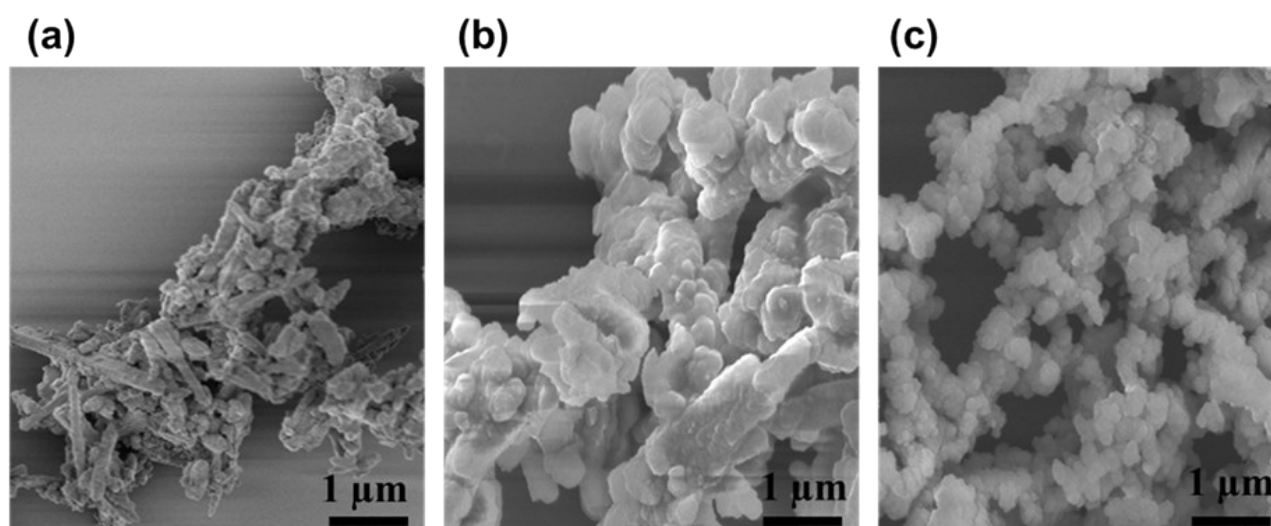

**Figure 25.** SEM images of (a) Py-F-CMP, (b) Py-TPA-CMP and (c) Py-TPE-CMP.

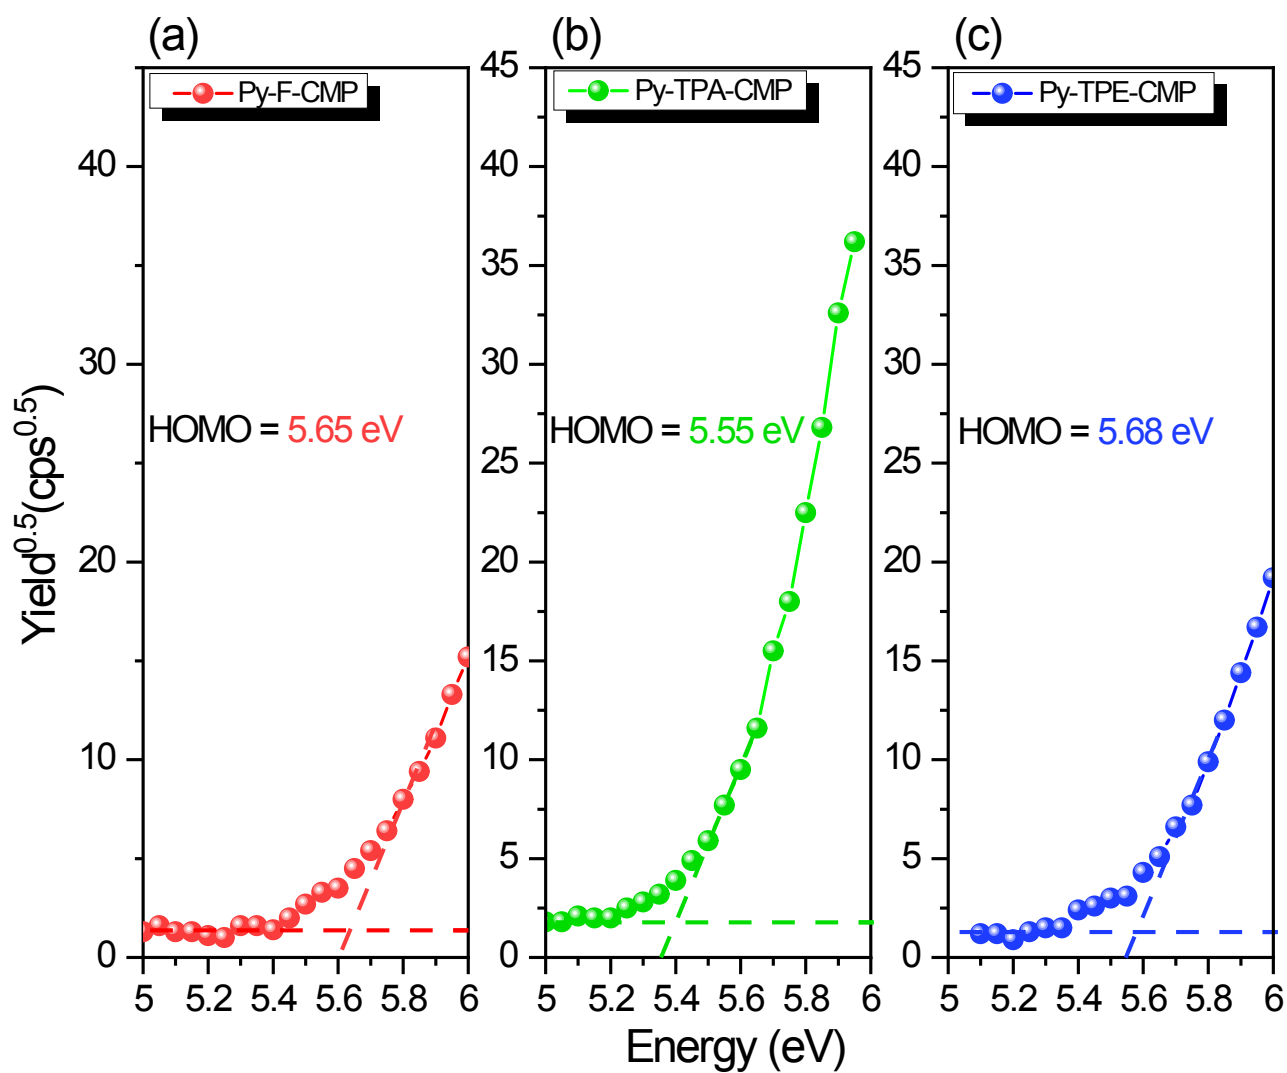

**Figure S26.** HOMO profiles of (a) Py-F-CMP, (b) Py-TPA-CMP and (c) Py-TPE-CMP.

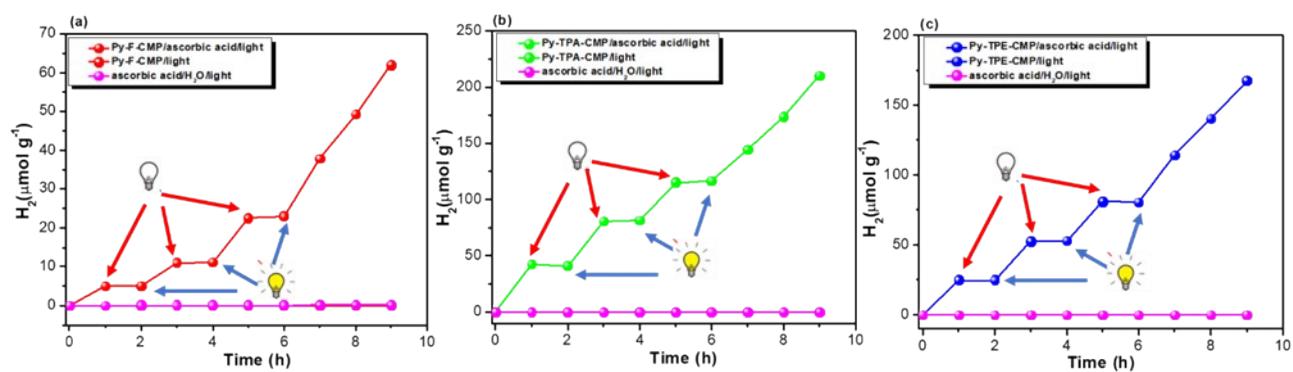

**Figure S27.** Control experiments for light-driven hydrogen generation from water at ambient temperature using (a) Py-F-CMP, (b) Py-TPA-CMP and (c) Py-TPE-CMP.

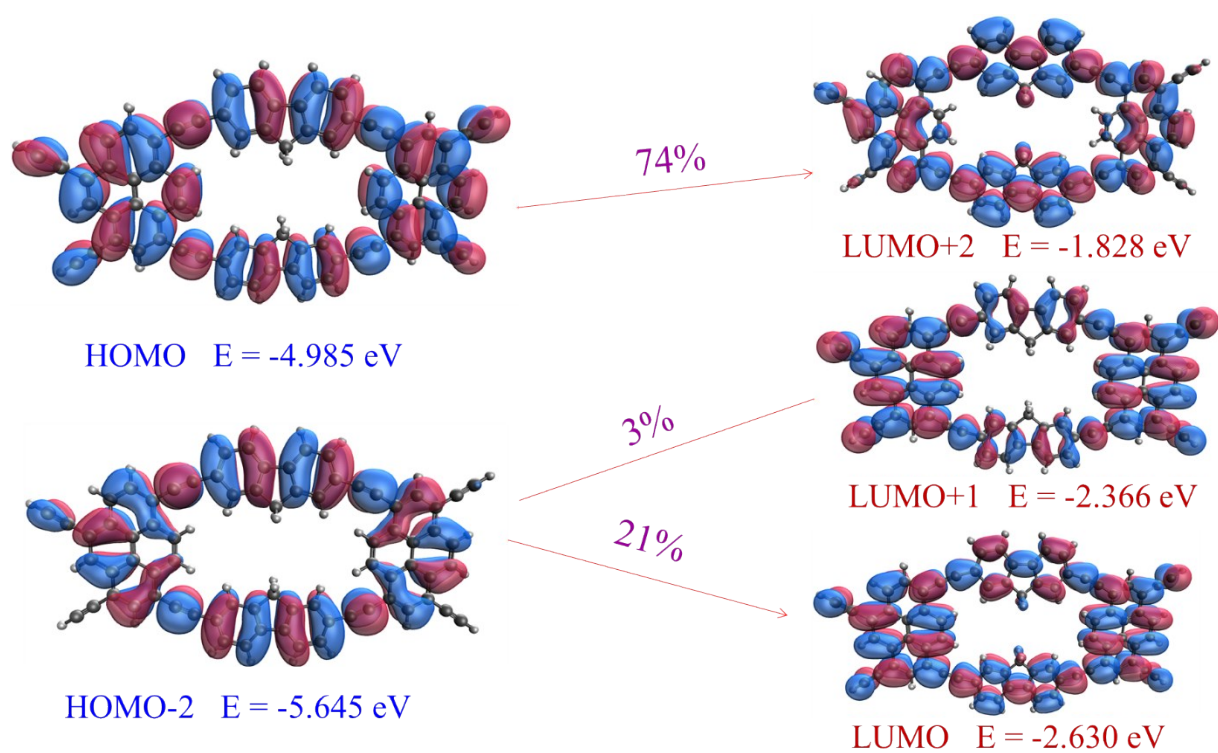

**Figure S28.** The excited states of the Py-F-CMP and the contribution of the transition between orbitals (the percentage on the arrow).

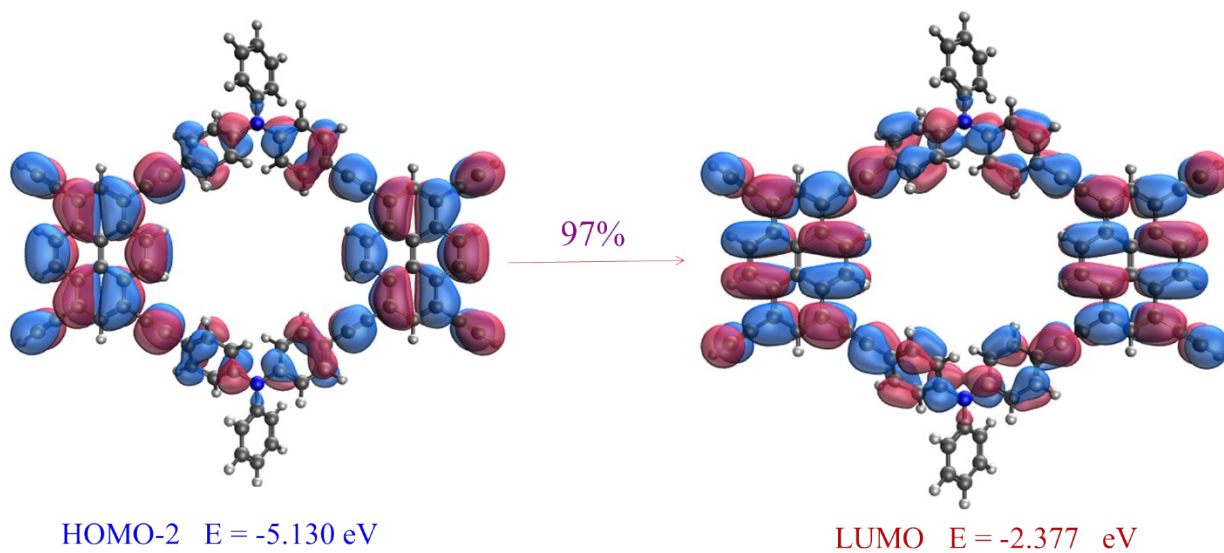

**Figure S29.** The excited states of the Py-TPA-CMP and the contribution of the transition between orbitals (the percentage on the arrow).

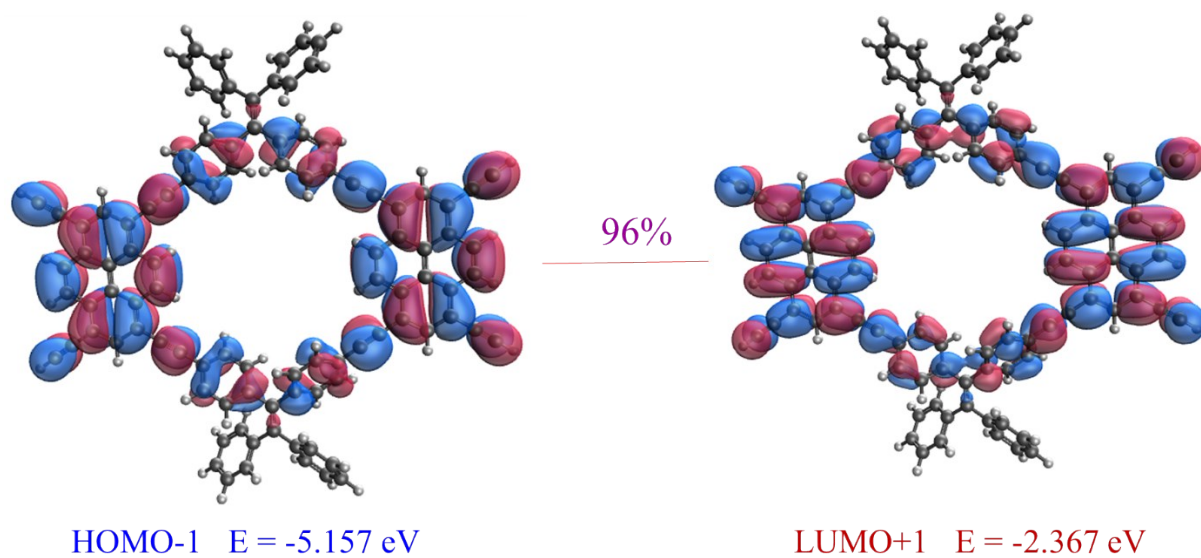

**Figure S30.** The excited states of the Py-TPE-CMP and the contribution of the transition between orbitals (the percentage on the arrow).



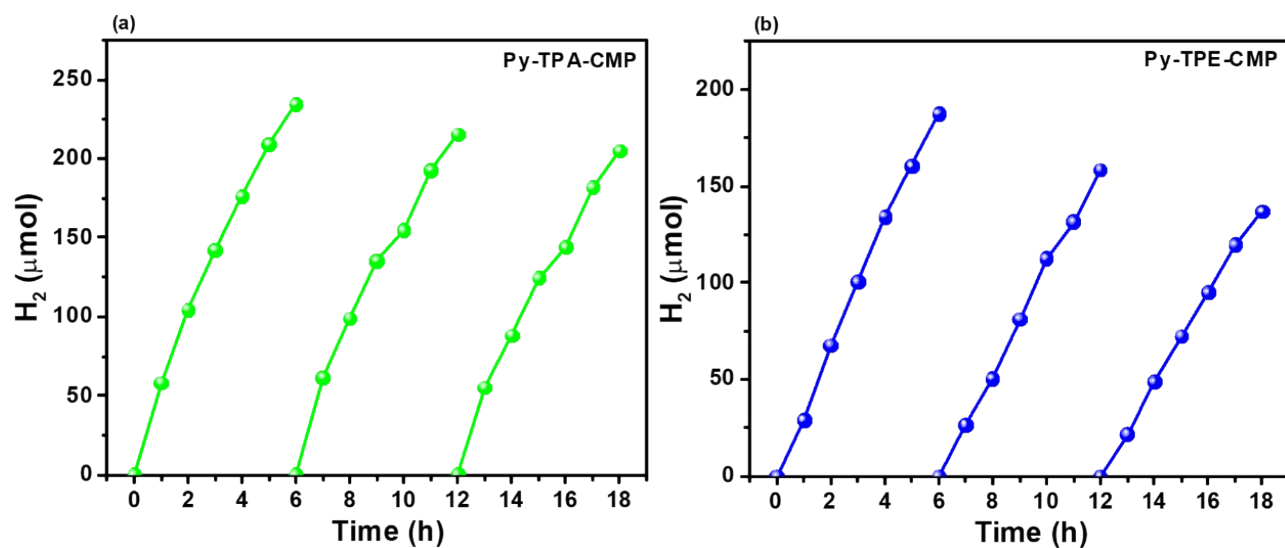

**Figure S31.** (a) and (b) Stability and recycling test using Py-TPA-CMP and Py-TPE-CMP as a photocatalyst under visible light irradiation ( $\lambda > 420$  nm).

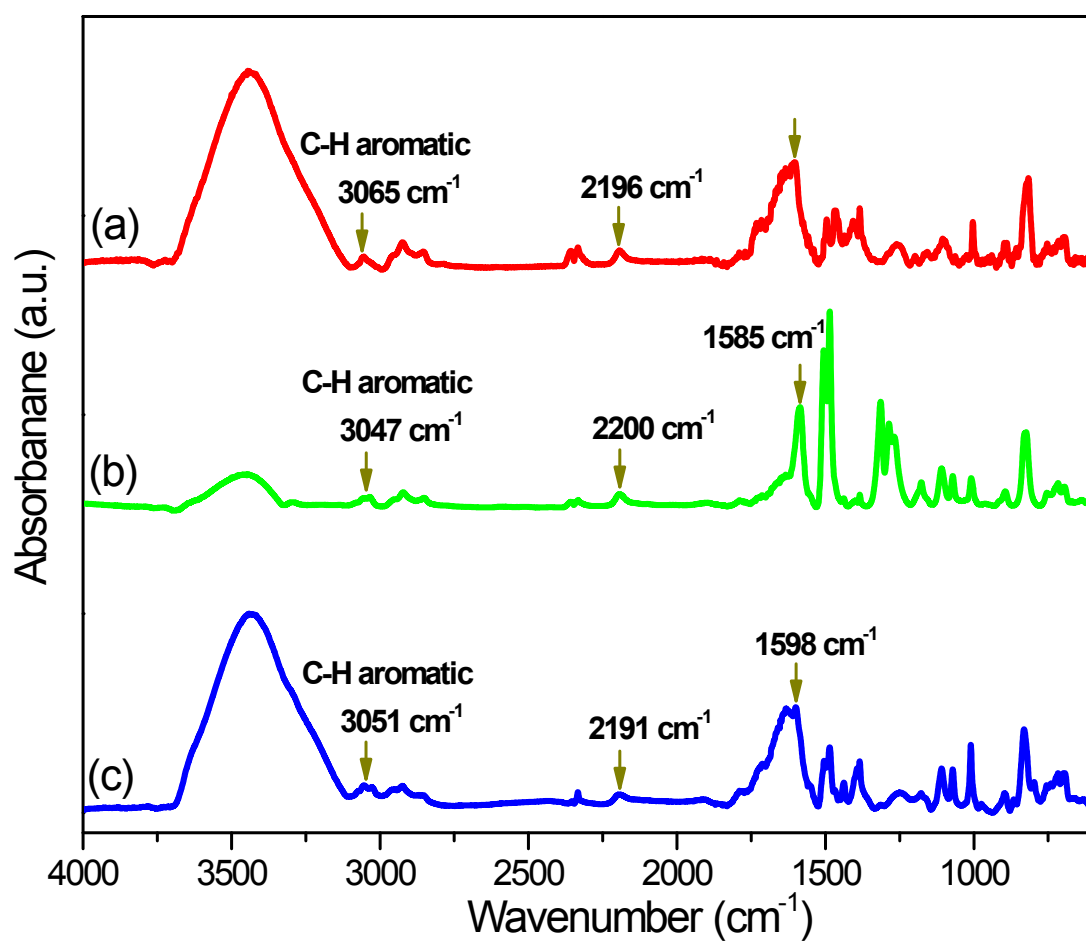

**Figure S32.** FTIR profiles of (a) Py-F-CMP, (b) Py-TPA-CMP and (c) Py-TPE-CMP after photocatalysts measurements.

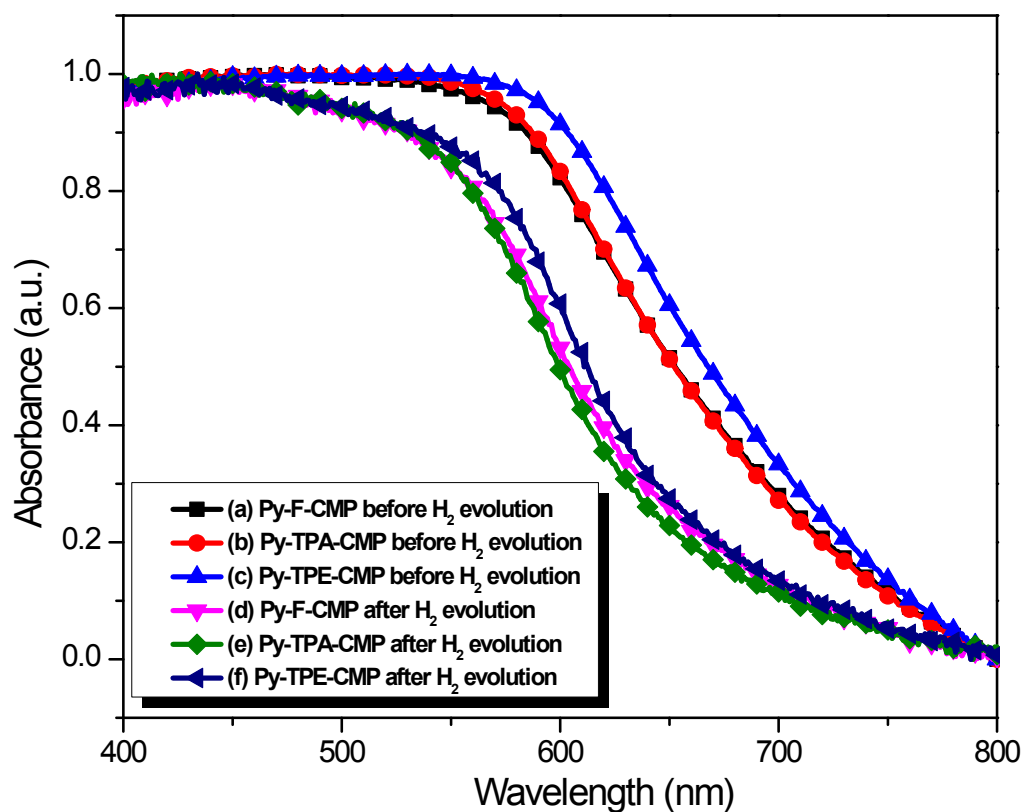

**Figure S33.** UV-Vis absorption spectra of (a) Py-F-CMP, (b) Py-TPA-CMP and (c) Py-TPE-CMP before photocatalysts measurements, and (d) Py-F-CMP, (e) Py-TPA-CMP and (f) Py-TPE-CMP after photocatalysts measurements.

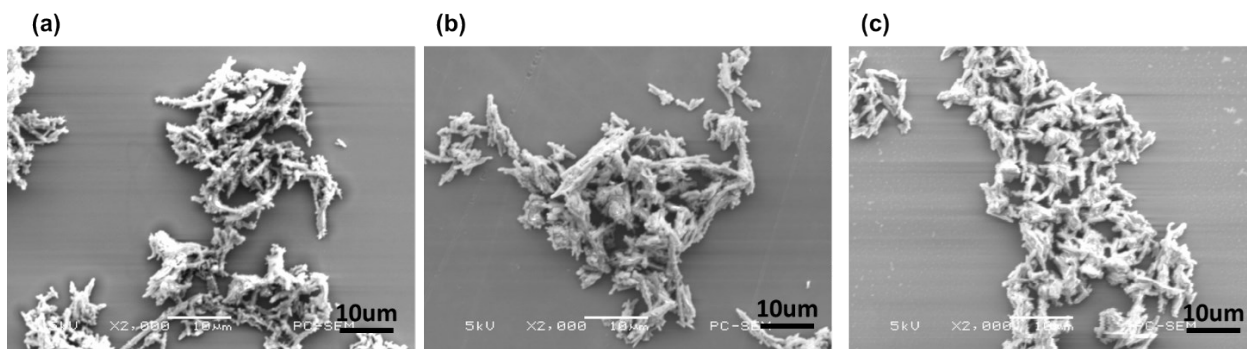

**Figure 34.** SEM images of (a) Py-F-CMP, (b) Py-TPA-CMP and (c) Py-TPE-CMP after photocatalysts measurements.

**Table S1.** Comparative studies of our designed pyrene-based microporous polymers with the reported CMPs in terms of photocatalytic hydrogen evolution.

| <b>Polymer Catalysts</b>                                   | <b>HER</b><br>$\lambda > 420 \text{ nm}$<br>( $\mu\text{mol h}^{-1}$ ) | <b>HER</b><br>$\lambda > 420 \text{ nm}$<br>( $\mu\text{mol h}^{-1}\text{g}^{-1}$ ) | <b>AQY %</b><br>$\lambda > 420 \text{ nm}$ | <b>Conditions</b>              | <b>References</b> |
|------------------------------------------------------------|------------------------------------------------------------------------|-------------------------------------------------------------------------------------|--------------------------------------------|--------------------------------|-------------------|
| COP-TP <sub>0:1</sub><br>COP-TP <sub>3:1</sub>             | 9<br>42                                                                | 900<br>4200                                                                         | ----<br>1.5                                | Water/TEOA<br>/ 3 wt% Pt       | <b>S1</b>         |
| L-PyBT<br>P-PyDFBT<br>P-PyBT<br>P-PyDFBT                   | 83.7<br>20.9<br>0.3<br>1.5                                             | 1674<br>418<br>6<br>30                                                              | ----                                       | Water/TEOA<br>/ 3 wt% Pt       | <b>S2</b>         |
| P1                                                         | 50                                                                     | ----                                                                                | 3.85                                       | Water/TEOA<br>/ 3 wt% Pt       | <b>S3</b>         |
| Ta-CMP<br>Ta-CMP-N<br>Ta-CMP-CN                            | 9.74<br>1.98<br>13.96                                                  | 487<br>99<br>698                                                                    | 0.12<br>0.07<br>0.15                       | Water/TEOA                     | <b>S4</b>         |
| 4-CzPN                                                     | ----                                                                   | 2103.2                                                                              | 6.4                                        | Water/TEOA<br>/ 3 wt% Pt       | <b>S5</b>         |
| CP1<br>CP2<br>CP3<br>CP4                                   | 95.85<br>1.25<br>0.47<br>1.03                                          | 15975<br>208<br>78<br>172                                                           | ----<br>----<br>----<br>----               | Water/AA<br>/DMF               | <b>S6</b>         |
| TFPT-CH <sub>3</sub><br>TFPT-PDAN<br>TFPT-OCH <sub>3</sub> | 4.4<br>11.8<br>22.1                                                    | ----<br>----<br>----                                                                | ---<br>---<br>1.03                         | Water/TEOA<br>/ 3 wt% Pt       | <b>S7</b>         |
| S-CMP3                                                     | ----                                                                   | 3,106                                                                               | 13.2                                       | Water/<br>MeOH/TEO<br>A        | <b>S8</b>         |
| P1<br>P2<br>P3<br>P4                                       | 50<br>0.9<br>22<br>1.3                                                 | 1000<br>18<br>440<br>26                                                             | ----<br>----<br>1.4<br>----                | Water/TEOA<br>/ 3 wt% Pt       | <b>S9</b>         |
| PyDF<br>PyDM                                               | ---<br>---                                                             | 13470<br>1,280                                                                      | 4.5<br>-                                   | Water/TEOA<br>/ 3 wt% Pt       | <b>S10</b>        |
| Py-TPA-CMP<br>Py-TPE-CMP<br>Py-F-CMP                       | 57.5<br>39.1<br>16.8                                                   | 19200<br>13033<br>5600                                                              | 15.3<br>6.3<br>2.3                         | Water/<br>MeOH/AA/<br>3 wt% Pt | This work         |

## References

- [S1] S. Nandy, T. Hisatomi, S. Sun, M. Katayama, T. Minegishi, and K. Domen, Effects of Se Incorporation in  $\text{La}_5\text{Ti}_2\text{CuS}_5\text{O}_7$  by Annealing on Physical Properties and Photocatalytic  $\text{H}_2$  Evolution Activity, *ACS Appl. Mater. Interfaces* 2018, **10**, 30698-30705.
- [S2] C. Cheng, X. Wang, Y. Lin, L. He, J. X. Jiang, Y. Xu and F. Wang, The effect of molecular structure and fluorination on the properties of pyrene-benzothiadiazole-based conjugated polymers for visible-light-driven, *Polym. Chem.*, 2018, **9**, 4468-4475.
- [S3] J. Yu, X. Sun, X. Xu, C. Zhang and X. He, Donor-Acceptor Type Triazine-based Conjugated Porous Polymer for Visible-Light-Driven Photocatalytic Hydrogen Evolution, *Appl. Catal. B Environ.* 2019, **257**, 117935.
- [S4] K. Ding, Q. Zhang, Q. Li and S. Ren, Terminal Group Effect of Conjugated Microporous Polymers for Photocatalytic Water-Splitting Hydrogen Evolution, *Macromol. Chem. Phys.* 2019, **220**, 1900304.
- [S5] G. Zhang, W. Ou, J. Wang, Y. Xu, D. Xu, T. Sun, S. Xiao, M. Wang, H. Li, W. Chen and C. Su, Stable, carrier separation tailorable conjugated microporous polymers as a platform for highly efficient photocatalytic  $\text{H}_2$  evolution, *Appl. Catal. B Environ.* 2019, **245**, 114-121.
- [S6] W. Y. Huang, Z. Q. Shen, J. Z. Cheng, L. L. Liu, K. Yang, X. Chen, H. R. Wen and S. Y. Liu, C–H activation derived CPPs for photocatalytic hydrogen production excellently accelerated by a DMF cosolvent, *J. Mater. Chem. A*, 2019, **7**, 24222-24230.
- [S7] K. Yu, S. Bi, W. Ming, W. Wei, Y. Zhang, J. Xu, P. Qiang, F. Qiu, D. Wu and F. Zhang, Side-

chain-tuned  $\pi$ -extended porous polymers for visible light-activated hydrogen evolution, *Polym. Chem.*, 2019, **10**, 3758-3763.

[S8] R. S. Sprick, Y. Bai, A. A. Y. Guilbert, M. Zbiri, C. M. Aitchison, L. Wilbraham, Y. Yan, D. J. Woods, M. A. Zwijnenburg, and A. I. Cooper, Photocatalytic Hydrogen Evolution from Water Using Fluorene and Dibenzothiophene Sulfone-Conjugated Microporous and Linear Polymers, *Chem. Mater.* 2019, **31**, 305-313.

[S9] J. Yu, S. Chang, X. Xu, X. He, and C. Zhang, The effect of single atom substitution (O, S or Se) on photocatalytic hydrogen evolution for triazine-based conjugated porous polymers, *J. Mater. Chem. C*, 2020, **8**, 8887-8895.

[S10] X. Gao, C. Shu, C. Zhang, W. Ma, S. B. Ren, F. Wang, Y. Chen, J. H. Zeng and J. X. Jiang, Substituent effect of conjugated microporous polymers on the photocatalytic hydrogen evolution activity, *J. Mater. Chem. A*, 2020, **8**, 2404-2411.
